# 1 Brain endothelial cells are exquisite sensors of age- 2 related circulatory cues

3  
4  
5 Michelle B. Chen<sup>1\*\*</sup>, Hanadie Yousef<sup>2\*\*</sup>, Andrew C. Yang<sup>1,2</sup>, Davis Lee<sup>2</sup>, Benoit Lehallier<sup>2</sup>,  
6 Nicholas Schaum<sup>3</sup>, Stephen R. Quake<sup>1,6\*</sup>, Tony Wyss-Coray<sup>2,4,5\*</sup>

7  
8  
9 <sup>1</sup>Department of Bioengineering, Stanford University, Stanford, CA, USA

10 <sup>2</sup>Department of Neurology and Neurological Sciences, Stanford School of Medicine

11 <sup>3</sup>Institute for Stem Cell Biology and Regenerative Medicine, Stanford University School of  
12 Medicine, Stanford, California, USA

13 <sup>4</sup>Department of Veterans Affairs, VA Palo Alto Health Care System, Palo Alto, CA 94304, USA

14 <sup>5</sup>Wu Tsai Neurosciences Institute, Stanford University, Stanford, CA, USA

15 <sup>6</sup>Chan Zuckerberg Biohub, Stanford, 94305, CA

16 \*Correspondence: [twc@stanford.edu](mailto:twc@stanford.edu) (T.W.-C.), [steve@quake-lab.org](mailto:steve@quake-lab.org) (S.R.Q)

17 \*\* Co-first authors

## 18 19 Highlights

- 20 • Single-cell RNA sequencing of brain endothelial cells (BECs) reveals transcriptional  
21 segmentation into distinct arterial, capillary, and venous identities with age and  
22 experimental interventions
  - 23 • Changes with age are heterogenous across vessel segments, with aged capillaries  
24 enriched in signatures of innate immunity, TGF- $\beta$  and VEGF signaling, hypoxia and  
25 oxidative stress
  - 26 • BECs sense and respond transcriptionally to diverse circulatory cues: inflammatory, pro-  
27 aging, or rejuvenating
  - 28 • Aged plasma exposure recapitulates—and young plasma reverses—key transcriptomic  
29 signatures of normal BEC aging
  - 30 • BEC response to aged and young plasma reveals cell non-autonomous mechanisms of  
31 blood-brain-barrier aging
- 32

33 **SUMMARY**

34 Brain endothelial cells (BECs) are key elements of the blood-brain barrier (BBB), protecting the  
35 brain from pathogens and restricting access to circulatory factors. Recent studies have  
36 demonstrated that the circulatory environment can modulate brain aging, yet, the underlying  
37 processes remain largely unknown. Given the BBB's intermediary position, we hypothesized that  
38 BECs sense, adapt to, and relay signals between the aging blood and brain. We sequenced single  
39 endothelial cells from the hippocampus—a brain region key to learning, memory, and  
40 neurogenesis— of healthy young and aged mice as well as post-exposure to inflammatory and  
41 age-related circulatory factors. We discovered that aged capillary BECs, compared with arterial  
42 and venous cells, exhibit the greatest transcriptional changes, upregulating innate immunity,  
43 antigen presentation, TGF- $\beta$  signaling and oxidative stress response pathways. Remarkably,  
44 short-term infusions of aged plasma into young mice recapitulated key aspects of this aging  
45 transcriptome, while infusions of young plasma into aged mice reversed select aging signatures,  
46 essentially rejuvenating the BBB endothelium transcriptome. We identify candidate pathways  
47 mediating blood-borne brain rejuvenation by comparing age-upregulated genes with those  
48 modulated by plasma exposure. Together, these findings suggest that the transcriptional age of  
49 BECs is exquisitely sensitive to age-related circulatory cues and pinpoint the BBB itself as a  
50 promising therapeutic target to treat brain disease.

51

52 **Keywords: brain endothelial cells, aging, rejuvenation, blood-brain barrier, single cell**

53 **RNAseq**

54

## 55 INTRODUCTION

56 Aging drives the deterioration of brain structure and function, increasing susceptibility to  
57 neurodegenerative disease and cognitive decline (Andrews-Hanna et al., 2007; Bishop et al.,  
58 2010; Mattson and Magnus, 2006). While the cell-intrinsic hallmarks of aging, from stem cell  
59 exhaustion to loss of proteostasis are established aspects of brain aging (López-Otín et al., 2013),  
60 recent studies have demonstrated cell non-autonomous mechanisms of brain aging via  
61 heterochronic parabiosis or blood plasma infusions (Wyss-Coray, 2016). Specifically, old plasma  
62 appears to impair and young plasma revitalizes cognitive function and hippocampal neurogenesis  
63 (Castellano et al., 2017; Katsimpardi et al., 2014; Khrimian et al., 2017; Villeda et al., 2011, 2014).  
64 Recently, infusion of aged plasma into young mice results in upregulation of vascular cell  
65 adhesion molecule 1 (VCAM1) in brain endothelial cells (BECs) and blocking via antibodies  
66 strongly reduces neuroinflammation and improves learning and memory function in aged mice  
67 (Yousef et al., 2019). Specific mouse and human proteins have recapitulated the effects of  
68 plasma, such as the pro-aging B2M and CCL11, and the rejuvenating TIMP2 (Castellano et al.,  
69 2017; Smith et al., 2015; Villeda et al., 2011). Nevertheless, while these studies show systemic  
70 effects on the brain, the exact mechanisms mediating these effects are largely unclear.

71 This is especially so considering that the brain is partitioned from the periphery via  
72 specialized vasculature—the blood-brain barrier (BBB) (Abbott et al., 2006; Broadwell, 1989;  
73 Daneman and Prat, 2014; Reese and Karnovsky, 2004). Relative to peripheral endothelium, the  
74 BBB exhibits limited permeability to macromolecules by employing unique tight junctions and low  
75 rates of transcytosis (Andreone et al., 2017; Ben-Zvi et al., 2014; Chow and Gu, 2015). These  
76 special properties are induced in development and maintained in adulthood by surrounding  
77 pericytes, smooth muscle cells, astrocytes, and neurons that form a functional ‘neurovascular  
78 unit’ (Armulik et al., 2010; Daneman et al., 2010). Dysfunction and breakdown of this unit have  
79 been implicated in age-related neurodegeneration and manifest in reduced cerebral blood flow,  
80 leakage of toxic factors, and a general inability to maintain an optimal environment for neuronal  
81 and stem cell function (Iadecola, 2013; Sweeney et al., 2018; Zhao et al., 2015; Zlokovic, 2008).

82 Though age-related BBB dysfunction has been probed with a diverse toolkit of tracers, the  
83 transcriptional heterogeneity of the BBB and vessel segment-specific responses to the  
84 parenchymal or systemic environment has been largely unexplored (Bien-Ly et al., 2015; Marques  
85 et al., 2013; Montagne et al., 2015; Mooradian, 1988; Vanlandewijck et al., 2018). Here, we study  
86 normal brain endothelial aging—and its response to inflammatory and age-related circulatory  
87 cues—by profiling hippocampal BECs using single-cell RNA sequencing. We characterize  
88 significant transcriptional changes across arterial, capillary, and venous cells, discovering a

89 surprising malleability to age-related plasma factors, and a heterogenous distribution of age-  
90 related receptors and signaling pathways across vessel segments. This suggests the BBB  
91 endothelium is positioned to and capable of mediating reversible, non-autonomous mechanisms  
92 of brain aging.

93

94

95

96

97

98

99

100

101

102

103

104

105

106

107

108

109

110

111

## 112 RESULTS

### 113 Brain endothelial cells exhibit segmental identities

114 We rapidly isolated and pooled CD31+CD45-Cd11b- BECs from mouse hippocampi and analyzed  
115 their transcriptomes using single-cell RNA sequencing as previously described (**Figure 1A**,  
116 **Figure S1A-C**)(Yousef et al., 2019). Cells passing QC had at least 50,000 reads, with a median  
117 of ~700,000 reads and ~1,800 expressed genes per cell (**Figure SI 1D-E**). All cells expressed at  
118 least one pan-BBB/endothelial marker at the mRNA level (*Cldn5*, *Cdh5*, *Pecam1*, *Ocln*, *Flt1*,  
119 *Esam*). Few cells exhibited both high mitochondrial and ribosomal gene counts, typical features  
120 of poor cell quality or health during the isolation and collection phase (Butler et al., 2018) (Figure  
121 SI 1F).

122 We first characterized the range of distinct cell populations within heterogenous  
123 hippocampal BECs from young (3 month-old) mice via transcriptome clustering of the top 2,500  
124 over-dispersed genes. Specifically, we searched for BEC populations defining segmental  
125 identities of arterioles, capillaries, and venules, as previously shown at a single-cell level  
126 (Vanlandewijck et al., 2018). Principal component analyses did not yield clear segmental or other  
127 phenotypic signatures, with venous (V) (*Slc38a5*, *Nr2f2*) and capillary (C) (*Slc16a1*) markers  
128 showing a generally diffuse distribution along the first 10 PCs, and arterial (A) (*Bmx*, *Efnb2*)  
129 markers being slightly more biased (**Figure 1B, top panel**). Upon further inspection, we found  
130 that FACS sorting via CD31+/CD45- alone yielded low numbers of arterial and venous cells (<6%  
131 per population), which were defined by a non-zero expression of at least 2/3 classical A and V  
132 gene markers (Arterial: *Bmx*, *Efnb2*, *Vegfc*, Venous: *Nr2f2*, *Slc38a5*, *Vwf*) (**Figure S2A**). Vascular  
133 cell adhesion molecule (*Vcam1*), a cell surface receptor that facilitates endothelial-immune cell  
134 interactions, has previously been shown to be highly enriched in arterial and venous cells and we  
135 established a method to isolate and enrich primary venous and arterial BECs using this marker  
136 (Vanlandewijck et al., 2018; Yousef et al., 2019). Taking advantage of the surface expression of  
137 VCAM1, we infused a fluorescently labeled anti-VCAM1 mAb retro-orbitally prior to mouse  
138 perfusion and tissue dissection which allowed us to enrich VCAM1+BECs using FACS. Addition  
139 of VCAM1+ sorted cells to the original dataset (~25% of all cells) resulted in a more biased (yet  
140 still continuous) distribution of the expression of known A-C-V markers, and an increase in A and  
141 V cell identities (**Figure 1B-C**). VCAM1 protein levels were highly correlated with mRNA content,  
142 and, nearly all *Vcam1* mRNA+ cells were co-positive for and highly correlated to either A or V  
143 markers, and largely absent in capillaries (**Figure SI 2B**). Not all arterial and venous cells defined  
144 were *Vcam1*+, suggesting that *Vcam1* is only expressed in a subset of arterial and venous cells,

145 Indeed, differential expression tests between *Vcam1*<sup>+/-</sup> arterial or venous populations show a  
146 basally more transcriptionally activated subset of BECs (**Figure SI 2C**) that are confined within A  
147 and V populations. Clarity of A-C-V populations was improved due to the increase in number of  
148 A and V cells (**Figure SI 2D**), which allows for previously small populations of arterial and venous  
149 cells, some of which expressed gene signatures more similar to capillaries on the zoned A-C-V  
150 gene expression axis, to emerge (Vanlandewijck et al., 2018).

151 Furthermore, by finding genes which are most enriched in arterial and venous clusters,  
152 we were able to identify potential new segmental markers for BECs (**Figure 1D**). Venous cells  
153 exhibited more shared genes with capillaries, than arterial cells. Arterial cells were enriched in  
154 *Mgp*, *Clu*, *Stmn2*, *Cdh13*, while venous cells were enriched in *Il1r1*, *Cfh*, *Ctsc* and *Tmsb10*. In  
155 fact, in contrast to classical venous (*Nr2f2*) and arterial (*Efnb2*) markers, these new markers were  
156 expressed across a significantly larger number of cells in their respective segment populations.  
157 In addition, these genes are not restricted to expression in *Vcam1*<sup>+</sup> subpopulations, making them  
158 more suitable markers for pan-arterial/venous cell identification (**Figure SI 2C**). Of note, gene  
159 products of *Cdh13* (Cadherin-13) and *Il1r1* (Interleukin 1 Receptor Type 1) are known to be  
160 expressed on the cell surface and confirmed to be enriched in the hippocampus, making them  
161 potential candidates for FACS enrichment of arterial or venous cells (**Figure 1E**).

162

### 163 **Systemic LPS administration activates common transcriptional programs across segment** 164 **identities**

165 To understand whether BECs can act as sensors of organismal-level perturbations, we  
166 administered LPS systemically in young mice to induce an acute inflammatory response. LPS  
167 serves as an acute perturbation, where dramatic organismal-wide changes are expected, and  
168 thus facilitates a preliminary study of BEC response to systemic cues. Out of 10,955 expressed  
169 genes across all BECs, a total of 1,610 differentially expressed genes (DEGs) were identified  
170 (FDR<0.05 threshold) between LPS-treated and untreated mice, with 865 DEGs in capillaries,  
171 881 in venous, and 956 in arterial identities. 357/1610 (22%) DEGs are shared between all three  
172 segments, while some are unique to one or two segment identities. Fairly even numbers of up-  
173 and down-regulated genes are observed with LPS, for all three segments (**Figure 2A**).  
174 Furthermore, LPS stimulation did not seem to change the native compositions of A-C-V identities  
175 (**Figure SI 3A**). GO pathway analyses of both up- and down-regulated DEGs reveal largely  
176 common pathways between vessel segments, including the upregulation of interleukin and  
177 interferon signaling, cytoskeletal remodeling, cell-matrix adhesion, and TGF- $\beta$  signaling

178 pathways, as well as the downregulation of EC proliferation, lipid and lipoprotein metabolism, and  
179 adherens junctions maintenance (**Figure 2B**). LPS induced large fold changes in expression  
180 levels of DEGs, with many genes exhibiting on-off responses such as the innate immunity genes  
181 *Lcn2*, *Icam1*, *Cebpd*, *Irf7*, *Litaf*, *Ifit3* (**Figure 2C**). *Lcn2* (Lipocalin2), a neutrophil-associated  
182 lipocalin that plays roles in innate immunity, was the most highly upregulated gene following LPS  
183 treatment in all A-C-V segments, while *Cd14*, a receptor for LPS was significantly upregulated in  
184 venous cells.

185

### 186 **Acquisition of aging BEC transcriptomic signatures is distinct across vessel segments**

187 Aging results in prominent changes in brain function and the hippocampus appears particularly  
188 vulnerable, showing the first signs of degeneration in Alzheimer's disease (Wyss-Coray, 2016).  
189 Because BECs are responsible for nutrient transport into the brain and communication between  
190 peripheral immune cells and the CNS, understanding how they age is crucial to understanding  
191 brain aging and neurodegeneration. We sequenced CD31+/CD45-/CD11b- BECs from the  
192 hippocampi of young (3 month-old) (981 cells) and aged (19 month-old) (1053 cells) disease-free  
193 mice. Approximately 20% of BECs were enriched for VCAM1 expression by FACS to increase  
194 the collection of arterial and venous BECs. Unbiased transcriptome clustering of all young and  
195 aged cells combined revealed 3 continuous subpopulations with transcriptional signatures of A-  
196 C-V identities, illustrated by the gradual zonation of *Gja4*, *Bmx*, *Slc16a1*, *Slc38a5*, *Nr2f2*, and  
197 *Vcam1* (**Figure 3A-B**, **Figure SI 4**). Aged and young BECs did not appear to show clear  
198 distinguishing signatures within the first 10 PCs (**Figure SI 5**), indicating that age does not  
199 obviously alter segmental identity.

200 Comparisons of aged and young BECs within A-C-V populations results in a total of 642  
201 unique DEGs (FDR<0.1, capillary: 443, venous: 207, arterial 182 DEGs). Interestingly, the degree  
202 of overlap in DEGs within vessel segments was much less compared to LPS treatment (**Figure**  
203 **2**), with only 40/642 (6%) DEGs shared between all three vessel segments. The majority of DEGs  
204 were found to be increased (86%) rather than decreased, suggesting a general upregulation of  
205 transcriptional programs (**Figure 3C**). Capillary cells exhibited higher numbers of DEGs than  
206 arterial or venous cells, with 298/443 (67%) of their DEGs being unique to the segment only  
207 (**Figure 3C-D**). Interestingly, aged cells exhibited a slightly higher number of expressed genes  
208 (mean=1,801 compared to 1,474), while capillaries expressed ~25% fewer genes than arterial  
209 and venous cells (mean=1,465 compared to A: 1,899 and V: 1,928) (**Figure SI 6A-B**).

210 Aged capillaries reveals strong upregulation in genes including stem-cell antigen 1 and 2  
211 (*Ly6e*, *Ly6a*), innate immunity (*Vwf*, *Cxcl12*, *Dusp3*, *Ifi27*, *Ifnar1*, *Il10rb*), antigen-processing

212 (*B2m*, *H2-K1*, *H2-D1*, *Tapbp*, *H2-T23*), VEGF-signaling (*Kdr*, *Flt1*, *Flt4*), matrix assembly (*Vim*,  
213 *Vwa1*, *Spock2*), cell adhesion (*Itga1*, *Itga6*, *Esam*), TGF- $\beta$  signaling (*Eng*, *Acvr11*, *Ltbp4*), hypoxia  
214 response (*Ldha*, *Pkm*, *Aldoa*, *Nos3*), and oxidative stress (*Sod1*, *Apoe*, *App*, *Prnp*, *Alpl*) (**Figure**  
215 **3E-F**). We also find a strong and consistent upregulation of genes encoding ribosomal subunits  
216 across all segments (e.g. *Rpl37*, *Rpl31*, *Rpl21*, *Rpl35*, *Rplp2*, *Rpl37a*, *Rps20*, *Rps27a*) (**Figure**  
217 **3E**). Changes in gene expression levels between aged and young BECs are subtler than those  
218 after LPS treatment. A comparison of DEGs in disease-free aging and with LPS treatment reveals  
219 few commonly shared DEGs, however several involved in innate immunity were commonly  
220 upregulated, including *B2m*, *H2-K1*, *H2-D1*, as well as some involved in ribosomal biogenesis  
221 and rRNA processing (*Rpl23*, *Rps12*, *Rps27*, *Rpl10*, *Rpsa*) (**Figure SI 3B**).

222 To ensure that the DEGs were not a consequence of differing cell numbers between tested  
223 groups or biological noise, we performed two sets of stringent tests. A permutation test was  
224 conducted on all DEGs (FDR<0.1) to ensure that the true average log fold change of each DEG  
225 fell beyond the 95th percentile of a randomly shuffled distribution (**Figure SI 6C**). In addition,  
226 DEGs were calculated within each of the four biological replicates (one biological replicate  
227 consisting of 4 pooled mice hippocampi), and only those found to be differentially expressed in 3  
228 out of 4 replicates passed the criteria. Altogether, we find that each vessel segment ages  
229 differentially, and that aged capillaries exhibit the greatest degree of change, upregulating  
230 signatures such as innate immunity, antigen processing, TGF- $\beta$  signaling, and oxidative stress  
231 response.

232

### 233 **Systemic injection of young mice with aged plasma recapitulates key signatures of aging** 234 **in BECs**

235 An aged circulatory environment, including changes in plasma or CSF proteomes, can promote  
236 brain dysfunction (Silva-Vargas et al., 2016; Villeda et al., 2011). However, the cellular and  
237 molecular mechanisms involved in relaying circulatory signals into the brain are unclear. We  
238 hypothesized that BECs play an intermediary role in sensing and responding to an aged  
239 circulatory proteome. Thus, we measured the transcriptional response of young BECs to soluble  
240 factors in the plasma of aged mice. We injected young mice with pooled plasma from aged mice  
241 (AMP) or PBS (150  $\mu$ l per injection) retro-orbitally, twice-daily for 4 days (Yousef et al., 2019) and  
242 collected CD31<sup>+</sup>/CD45<sup>-</sup> as well as CD31<sup>+</sup>/CD45<sup>-</sup>/VCAM1<sup>+</sup> cells from the hippocampus (**Figure**  
243 **4A**). Single cell RNA sequencing and dimensionality reduction of AMP (n=333 cells) and PBS  
244 (n=206) treated young BECs revealed the same arteriovenous zonation found in normal aged  
245 mice, with segmental identity, rather than plasma treatment, being the main driver of



246 heterogeneity (within the first 15 PCs) (**Figure 4B-C, Figure SI 7A**). Interestingly, BECs again  
247 respond differentially to plasma treatment depending on the vessel segment identity, with  
248 capillaries exhibiting a strikingly larger number of DEGs compared to arterial and venous cells,  
249 even when they are downsampled to match sample powers in other groups. Out of 12042  
250 detected genes, 829 genes were found to be differentially regulated in capillaries (FDR<0.1) and  
251 most are up-regulated (692 – 83% of DEGs). Importantly, only a small subset (<10%) of these  
252 DEGs were also found differentially perturbed by injecting aged-matched young plasma into  
253 young mice, indicating that most of the effects of AMP in young mice are specific to the age of  
254 the plasma (SI Table 1). Thus, capillaries are highly responsive to factors in the exogenous aged  
255 plasma, inducing activation of existing or new transcriptional programs (**Figure 4D-E, Figure SI**  
256 **7D**).

257         Excitingly, we discovered a significant overlap between transcriptional changes in BECs  
258 as a result of normal aging and exposure to AMP. This overlap was most striking in capillaries  
259 and less pronounced in venous and arterial cells (**Figure SI 7B-C**). Out of 443 DEGs in aging and  
260 829 DEGs in AMP treatment, 149 (up-regulated) and 4 (down-regulated) transcripts were found  
261 to be shared, and these intersecting DEGs comprised ~34% and 18% of total DEGs in each  
262 comparison, respectively (**Figure 4F**). This overlap is significant as the intersecting number is  
263 above the 99<sup>th</sup> percentile of the distribution of intersects if genes were randomly chosen from each  
264 group. Surprisingly, nearly all of the intersecting genes are expressed at higher levels in AMP  
265 treated cells compared to normal aging (**Figure SI 7E-F**) suggesting that factors in AMP are  
266 powerful inducers of key aspects of BEC aging. Indeed, pathway analysis of the 149 commonly  
267 up-regulated transcripts pointed to similar pathways enriched in normal aging, including innate  
268 immunity (*Dusp3, Ifi27, Ifnar1, Il10rb, Vim, H2-T23, Icam2, Calm1, Myo10, Anxa2, Canx*), cellular  
269 senescence (*Uba52, Sod1, Rbx1, Elob, Fkbp4*), TGF- $\beta$  signaling (*Nedd8, Bmpr2, Id1, Pdgfb*),  
270 hypoxia and stress (*Hspa1a, Hspb1*), and ribosomal processing (*Rpl10, Rpl10a, Rpl13, Rpl18a,*  
271 *Rpl26, Rpl28*) (**Figure 4G**).

272

### 273 **Systemic injections of aged mice with young plasma reverses key transcriptional** 274 **changes of aging in BECs**

275 The plasma of young mice can exert rejuvenating effects on the brains of aged mice after  
276 intravenous delivery, resulting in increased neurogenesis, memory and learning, dendritic spine  
277 density, and decreased neuro-inflammation and microglial activity (Wyss-Coray, 2016). To test if  
278 aged BECs are similarly responsive to acute injections of young mouse plasma (YMP), we

279 injected aged mice with pooled YMP or PBS, isolated hippocampal BECs, and sequenced RNA  
280 from individual cells as described above (**Figure 5A**). Dimensionality reduction of all YMP (n=256)  
281 and PBS control treated cells (n=121) resulted in distinct ACV populations, with no obvious  
282 separation between treatment conditions (PCs 1 to 15) (**Figure 5 B-C**). Again, capillaries  
283 responded most significantly to plasma injections but, unlike BECs exposed to AMP, the great  
284 majority of transcripts were downregulated with YMP infusion (206/257 DEGs – 80%  
285 downregulated) (**Figure 5D**). Prominently down-regulated pathways include antigen processing  
286 and presentation via MHC Class 1 (*H2-D1*, *H2-Q6*, *H2-Q7*, *H2-T22*, *H2-T23*, *B2m*, *H2-K1*,  
287 *Tapbp*), innate immune response and cytokine (interferon) signaling (*Icam2*, *Ifi27*, *Ifitm3*, *Ifih1*,  
288 *Ifit3*, *Vwf*,) metabolic processes, and ribosomal biogenesis and rRNA processing (*Rpl13*, *Rpl38*,  
289 *Rpl41*, *Rps27*, *Rps27a*, *Rps29*, *Rps8*) (**Figure SI 8A**).

290 These findings suggest that YMP infusions are capable of reversing certain BEC aging  
291 signatures. Indeed, in capillaries, 89 DEGs increase with normal aging and decrease following  
292 YMP infusion, which comprises 12% and 31% of DEGs in normal aging and YMP infusions,  
293 respectively (**Figure 5E**). Strikingly, these 89 genes are enriched in key aging signature pathways  
294 (**Figure 3E**) including ribosomal biogenesis/rRNA processing (*Rpl13*, *Rpl31*, *Rpl36*, *Rpl38*, *Rpl41*,  
295 *Rps13*, *Rps21*, *Rps27*, *Rps28*, *Rps8*), immune system and cytokine signaling (*Vwf*, *Ifi27*, *Ifitm3*,  
296 *Ifitm2*, *Ifit3*), antigen processing and presentation (*B2m*, *H2-K1*, *H2-D1*, *H2-T23*, *Psmb9*, *Psmc2*),  
297 and response to oxidative stress (*Ndufb4*, *Apoe*, *Sod1*, *Nostrin*) (**Figure 5D**).

298

### 299 **Young plasma reverses select transcriptional changes of aging induced by AMP**

300 To determine whether young plasma factors could specifically reverse transcriptional changes in  
301 BECs induced by aged circulatory factors, we compared the 149 shared DEGs between  
302 Aged/Young and AMP/PBS (**Figure 4F**) and 89 shared DEGs between Aged/Young and  
303 YMP/PBS (**Figure 5E**) using GeneAnalytics software to identify commonalities in pathways and  
304 directionality (**Figure 6A-B**, **Figure SI 9**). Pathways represented in both datasets include TGF- $\beta$   
305 signaling, cellular senescence, respiratory electron transport, innate immunity, interferon  
306 signaling, cholesterol biosynthesis, response to oxidative stress, and rRNA processing. It is  
307 important to note that genes enriched in each common pathway do not entirely intersect,  
308 suggesting that upregulation and then attenuation of pathways may not necessarily involve the  
309 same full set of genes. 42 DEGs lie in the “triple-intersect”, representing various pathways such  
310 as immune response signaling, with antigen processing (*H2-T23*), immune cell adhesion (*Icam2*),  
311 and interferon (*Ifi27*) amongst the top genes upregulated by aging and AMP and downregulated  
312 by YMP (**Figure 6C**). Strikingly, oxidative stress response was strongly enriched in aging and

313 AMP-treated BECs and reduced by YMP, with *ApoE*, *Sod1*, *Ndufa6*, *Nostrin*, and *Selenow* being  
314 differentially regulated in all three datasets.

315 To further explore whether the transcriptional changes in response to YMP and AMP may  
316 be the result of BEC sensing of peripheral plasma factors, we identified those genes among the  
317 42 intersecting genes (**Figure 6A**) which encoded for receptors or membrane proteins (**Figure**  
318 **6D**). We then matched the resulting 15 BEC external membrane proteins with putative ligands  
319 based on a published resource for receptor-ligand pairs (Ramilowski et al., 2015) and highlighted  
320 those ligands which we detected in mouse plasma. Interestingly, we identified *Bmpr2* (ligands:  
321 *BMP7*, *GDF9*), *Flt4* (ligand: *FN1*), *lfnar1* (ligand: *IFNA10*), *Igf1r* (ligand: *CDH1*, *GPC3*, *INS*), and  
322 *Lsr* (Ligand: *APOB*) were not only genes upregulated both with aging and AMP, but some of their  
323 ligands were increasing with age in mouse plasma, and have also been reported to increase in  
324 human plasma with age (Sun et al., 2018; Tanaka et al., 2018).

325

## 326 **DISCUSSION**

327 Aging is characterized by the gradual decline in physiological integrity and organ function. In the  
328 brain, aging is a key risk factor for cognitive decline, neurodegeneration and diseases such as  
329 Alzheimer's disease. With growing evidence that systemic factors, and those in the circulation in  
330 particular, can modulate brain aging and function (Wyss-Coray2016), the brain vasculature  
331 becomes an obvious putative receiver and transmitter of such circulatory cues to the brain. With  
332 this in mind, we characterize here the transcriptome of aging BECs and demonstrate that  
333 capillaries are especially sensitive to changes in aging factors in blood.

334 Single cell RNA sequencing in young mice revealed unique transcriptional signatures for  
335 BECs composing arterial, capillary, and venous vascular segments, confirming recent findings by  
336 Vanlandewijck and colleagues (Vanlandewijck et al., 2018) and our own lab (Yousef et al., 2019).  
337 Importantly, we report here this zonation is not perturbed with age even though significant gene  
338 expression changes can be found between ages. Moreover, BEC zonation does not change  
339 following systemic exposure of mice to a strong inflammatory trigger, LPS, in spite of several  
340 hundred genes changing in unison across the BEC subtypes. Lastly, BEC zonation does not  
341 change in mice injected systemically with heterochronic plasma. Together, these observations  
342 suggest segmental identity at the transcriptional level is rather stable in response to circulatory  
343 environmental cues and possibly defined by more proximal, cellular interactions and signals in  
344 the BBB. Additional studies will be necessary to identify these determinants of BEC identity.

345 While LPS injection induced a concerted upregulation of inflammatory and downregulation  
346 of metabolic pathways across all BEC subtypes, aging induced largely zonation specific changes,

347 except a prominent increase in genes involved in translation and RNA biogenesis. Overall,  
348 capillary transcriptomes are most responsive to aging as well as intravenous heterochronic  
349 plasma administration. Capillary BECs are by far the most abundant segmental subtype in the  
350 brain vasculature and while the hemodynamic conditions are different in capillaries than in  
351 arterioles and venules, it seems unlikely that this is the cause of their differential response to  
352 circulatory cues. It will thus be interesting to determine if capillary BECs are transcriptionally wired  
353 to respond to systemic changes and whether this is the result of their interaction with pericytes,  
354 other mural cells, glia, and neurons. Equally interesting will be to study the implications of the  
355 observed age-related capillary changes on BBB function and neuro-vascular coupling and to  
356 endothelial-CNS parenchyma communication in general.

357 It seems maybe surprising that administration of relatively small amounts of heterochronic  
358 plasma (<10% of blood volume per injection) over just 4 days induces robust transcriptional  
359 changes in BECs in hundreds of genes. This was particularly evident in capillary BECs of young  
360 mice treated with aged plasma (828 DEGs) but also significant in aged mice treated with young  
361 plasma (206 DEGs), supporting the notion that capillary BECs are exquisitely and acutely  
362 sensitive to changes in the circulation. More importantly, heterochronic plasma injections are  
363 sufficient for inducing signatures of aging according to the age of the injected plasma. Aged  
364 plasma infusions into young mice strongly induces signatures identified with normal BEC aging  
365 including ribosomal RNA processing, hypoxia response, innate immunity, cellular senescence,  
366 and TGF- $\beta$  signaling. The latter may be particularly interesting as increased TGF- $\beta$  signaling in  
367 the vasculature has been linked to age-related basement membrane thickening and cerebral  
368 amyloid angiopathy (Wyss-Coray et al., 1997) and to inhibit neural progenitor cell proliferation in  
369 the hippocampus (Buckwalter et al., 2006; Yousef et al., 2015a;). Conversely, young plasma  
370 administered systemically to aged mice results in a strong downregulation of normal BEC aging  
371 signatures including oxidative stress response, innate immunity (via MHC-1), interferon signaling  
372 and antigen presentation. *B2m*, which is upregulated by aging and reversed by YMP, is a critical  
373 component of major histocompatibility class 1 (MHC-1) molecules (e.g. *H2-K1* and *H2-D1*), which,  
374 enabled by the *Tap1* transporter, allow the recognition of pathogenic antigens by cognate T-cells.  
375 These functions can be further augmented by interferons such as *Ifi27* and *Ifnar1*, which is also  
376 increased with aging. Not only has soluble *B2m* previously been found at higher levels in human  
377 patients with HIV-associated dementia and Alzheimer's disease (Carrette et al., 2003), it also  
378 exerts negative effects on hippocampal neurogenesis and cognition following systemic injection  
379 (Smith et al., 2015). Strikingly, young plasma exposure upregulates  $\beta$ -catenin in aged BECs. Wnt/  
380  $\beta$ -catenin signaling is necessary for maintaining specialized BBB properties, such as tight junction

381 expression and low expression of leukocyte adhesion molecules, but is compromised upon injury,  
382 inflammation, and likely during aging (Lengfeld et al., 2017; Liebner et al., 2008; Tran et al., 2015;  
383 Zhou and Nathans, 2014). Recently,  $\beta$ -catenin expression alone has been found sufficient to  
384 convert leaky vessels in circumventricular organs to a barrier-type state, with stabilized junctions  
385 and decreased tracer permeability (Benz et al.; Wang et al., 2019). This suggests factors in young  
386 plasma may hold restorative properties for an aged BBB, and could be partly modulated by Wnt/  
387  $\beta$ -catenin signaling programs.

388

389         The 42 genes which mimic an aging transcriptome in young AMP-infused mice and whose  
390 expression is reversed (“rejuvenated”) in aged YMP-infused mice are of particular interest.  
391 Several of these genes (*Sod1*, *ApoE*, *Selenow*, *Ndufa6*, *Nostrin*) have established roles in  
392 oxidative stress response. Increases in reactive oxygen species (ROS) have been consistently  
393 observed in aging and accumulation of oxidative damage to macromolecules is a hallmark of  
394 aging, contributing to cellular senescence, loss of proliferation, and secretion of chemokines,  
395 interleukins and MMPs (Balaban et al., 2005; Liguori et al., 2018). Interestingly, transcript levels  
396 of superoxide dismutase (*Sod1*), an antioxidant shown to increase lifespan, decrease the rate of  
397 telomere shortening (Serra et al., 2003) and protect AD model mice (Murakami et al., 2011), are  
398 increased in BECs with aging and AMP infusion. Similarly, selenoprotein W (*Selenow*), an  
399 antioxidant that protects cells from peroxide-mediated damage (Jeong et al., 2004) and eNOS  
400 traffic inducer (*Nostrin*), an endothelial-specific attenuator of vascular oxidative stress  
401 (Förstermann, 2010) are upregulated with aging and AMP infusions, possibly reflecting a  
402 protective response induced by factors present in aged plasma. We also find a similar expression  
403 pattern in *Rps27* and *Rpl38*, genes involved in ribosomal biogenesis, and *ApoE*, a gene  
404 consistently associated with longevity and AD (Kim et al., 2009) and exerting antioxidant  
405 properties as well (Jofre-Monseny et al., 2008). Importantly, however, the number of non-  
406 intersecting genes between the AMP/normal aging and YMP/normal aging datasets suggests that  
407 some aspects of AMP and YMP treatments are not directly antagonistic. YMP treatments can  
408 possibly result in the rejuvenation of aging signatures that are not consequences of factors in  
409 aged blood but due to other mechanisms of aging. For instance, YMP infusion reduces the  
410 expression of genes involved in antigen presentation (*B2m*, *H2-K1*, *H2-D1*, *H2-T23*) and most of  
411 these genes are only increased with normal aging and not with AMP infusions. Conversely,  
412 expression of regulators of cell death (*Txn*, *Lmna*, *Pim1*, *Ndr1*) increase with aging and AMP  
413 infusion but they are not significantly affected by YMP infusion.

414 It is likely that many of the changes in BEC gene expression observed with AMP or YMP  
415 involve direct receptor-ligand interactions at the luminal surface of these cells. We identified 15  
416 BEC genes - which are not only increased with age but also significantly perturbed by AMP or  
417 YMP exposure - that encode for luminal membrane proteins and matched them with their known  
418 ligands based on a draft receptor-ligand network in humans (Ramilowski et al., 2015) and our  
419 own database of the circulating mouse plasma proteome. Standing out in this list is the IGF1  
420 receptor (Igf1r), which not only increases in expression with aging and aged plasma infusion but  
421 its corresponding ligands insulin (INS), glypican 3 (GPC3) and cadherin 1(CDH1) are also  
422 increased in aged plasma. Single mutations or deletions of IGF1R homologues increase lifespan  
423 in *C.elegans* (Kimura et al., 1997) and *Drosophila* (Tatar et al., 2001) and may affect longevity in  
424 humans as well (Milman et al., 2016). Other possible mediators of BEC aging are interferons  
425 binding to *Ifnar1*, and BMP or GDFs binding to *Bmpr2*, all increasing in levels in aged mice plasma  
426 and BECs, respectively and linked to aging (Katsimpardi et al., 2014; Loffredo et al., 2013; Yousef  
427 et al., 2015a).

428

#### 429 **ACKNOWLEDGEMENTS**

430 We thank S. Kolluru and D. Henderson for assistance in library preparation; N. Neff and J.  
431 Okamoto for assistance with sequencing; W. Wang, D. Croote, F. Zanini, R. Jones for helpful  
432 discussions and computational assistance. This work was funded by the Department of Veterans  
433 Affairs (T.W.-C.), the National Institute on Aging (F32-AG051330 to H.Y., R01-AG059694 and  
434 DP1-AG053015 to T.W.-C.), the D. H. Chen Foundation (T.W.-C.), The Glenn Foundation for  
435 Aging Research (T.W.-C), a SPARK grant to H.Y. through the Stanford Clinical and Translational  
436 Science Award (CTSA) to Spectrum (UL1 TR001085) and the Big Idea Brain Rejuvenation Project  
437 from the Wu Tsai Neurosciences Institute (T.W.-C.). S.R.Q. is a Chan Zuckerberg Investigator.

#### 438 **AUTHOR CONTRIBUTIONS**

439 M.B.C., H.Y., A.Y., T.W.-C. designed the research. H.Y. and D.L. performed mouse  
440 experiments and provided samples for young/aged healthy mice and AMP treated young mice.  
441 A.Y. performed mouse experiments and provided samples for healthy mice and YMP-treated  
442 mice. M.B.C. performed single cell library preparation and sequencing pipeline and performed  
443 all data analysis, with input from A.Y., H.Y., and T.W.-C. B.L. and N.S. provided data on the  
444 mouse aging plasma proteome. M.B.C. and B.L. generated figures. M.B.C., A.Y., T.W.-C. wrote  
445 the manuscript with revisions by H.Y and B.L. T.W.-C. and S.R.Q. oversaw the project.

446 **REFERENCES**

447

448 Abbott, N.J., Rönnebeck, L., and Hansson, E. (2006). Astrocyte-endothelial interactions at the  
449 blood-brain barrier. *Nat. Rev. Neurosci.* 7, 41–53.

450 Andreone, B.J., Chow, B.W., Tata, A., Lacoste, B., Ben-Zvi, A., Bullock, K., Deik, A.A., Ginty,  
451 D.D., Clish, C.B., and Gu, C. (2017). Blood-Brain Barrier Permeability Is Regulated by Lipid  
452 Transport-Dependent Suppression of Caveolae-Mediated Transcytosis. *Neuron* 94, 581–  
453 594.e5.

454 Andrews-Hanna, J.R., Snyder, A.Z., Vincent, J.L., Lustig, C., Head, D., Raichle, M.E., and  
455 Buckner, R.L. (2007). Disruption of Large-Scale Brain Systems in Advanced Aging. *Neuron* 56,  
456 924–935.

457 Armulik, A., Genové, G., Mäe, M., Nisancioglu, M.H., Wallgard, E., Niaudet, C., He, L., Norlin,  
458 J., Lindblom, P., Strittmatter, K., et al. (2010). Pericytes regulate the blood-brain barrier. *Nature*  
459 468, 557–561.

460 Balaban, R.S., Nemoto, S., and Finkel, T. (2005). Mitochondria, Oxidants, and Aging. *Cell* 120,  
461 483–495.

462 Ben-Zvi, A., Lacoste, B., Kur, E., Andreone, B.J., Mayshar, Y., Yan, H., and Gu, C. (2014).  
463 Mfsd2a is critical for the formation and function of the blood-brain barrier. *Nature* 509, 507–511.

464 Benz, F., Wichitnaowarat, V., Lehmann, M., and Germano, R.F. V Low Wnt /  $\beta$  - catenin  
465 signaling determines leaky vessels in the subfornical organ and affects water homeostasis in  
466 mice .

467 Bien-Ly, N., Boswell, C.A., Jeet, S., Beach, T.G., Hoyte, K., Luk, W., Shihadeh, V., Ulufatu, S.,  
468 Foreman, O., Lu, Y., et al. (2015). Lack of Widespread BBB Disruption in Alzheimer’s Disease  
469 Models: Focus on Therapeutic Antibodies. *Neuron* 88, 289–297.

470 Bishop, N.A., Lu, T., and Yankner, B.A. (2010). Neural mechanisms of ageing and cognitive  
471 decline. *Nature* 464, 529–535.

472 Broadwell, R.D. (1989). Transcytosis of macromolecules through the blood-brain barrier: a cell  
473 biological perspective and critical appraisal. *Acta Neuropathol.* 79, 117–128.

- 474 Buckwalter, M.S., Yamane, M., Coleman, B.S., Ormerod, B.K., Chin, J.T., Palmer, T., and  
475 Wyss-Coray, T. (2006). Chronically increased transforming growth factor-beta1 strongly inhibits  
476 hippocampal neurogenesis in aged mice. *Am. J. Pathol.* 169, 154–164.
- 477 Butler, A., Hoffman, P., Smibert, P., Papalexi, E., and Satija, R. (2018). Analysis Integrating  
478 single-cell transcriptomic data across different conditions , technologies , and species. *Nat.*  
479 *Biotechnol.* 36, 411–420.
- 480 Carrette, O., Demalte, I., Scherl, A., Yalkinoglu, O., Corthals, G., Burkhard, P., Hochstrasser,  
481 D.F., and Sanchez, J.-C. (2003). A panel of cerebrospinal fluid potential biomarkers for the  
482 diagnosis of Alzheimer's disease. *Proteomics* 3, 1486–1494.
- 483 Castellano, J.M., Mosher, K.I., Hinkson, I. V., Tingle, M., Angst, M.S., Zou, B., Berdnik, D.,  
484 McBride, A.A., Shen, J.C., Xie, X.S., et al. (2017). Human umbilical cord plasma proteins  
485 revitalize hippocampal function in aged mice. *Nature* 544, 488–492.
- 486 Chow, B.W., and Gu, C. (2015). The Molecular Constituents of the Blood-Brain Barrier. *Trends*  
487 *Neurosci.* 38, 598–608.
- 488 Daneman, R., and Prat, A. (2014). The Blood Brain Barrier (BBB). *Cold Spring Harb. Perspect.*  
489 *Biol.* 10, 1–24.
- 490 Daneman, R., Zhou, L., Kebede, A.A., and Barres, B.A. (2010). Pericytes are required for  
491 blood-brain barrier integrity during embryogenesis. *Nature* 468, 562–566.
- 492 Förstermann, U. (2010). Nitric oxide and oxidative stress in vascular disease. *Pflügers Arch. -*  
493 *Eur. J. Physiol.* 459, 923–939.
- 494 Iadecola, C. (2013). The Pathobiology of Vascular Dementia. *Neuron* 80, 844–866.
- 495 Jeong, D., Kim, E.H., Kim, T.S., Chung, Y.W., Kim, H., and Kim, I.Y. (2004). Different  
496 Distributions of Selenoprotein W and Thioredoxin during Postnatal Brain Development and  
497 Embryogenesis. *Mol. Cells* 17, 156–159.
- 498 Jofre-Monseny, L., Minihane, A.-M., and Rimbach, G. (2008). Impact of apoE genotype on  
499 oxidative stress, inflammation and disease risk. *Mol. Nutr. Food Res.* 52, 131–145.
- 500 Katsimpardi, L., Litterman, N.K., Schein, P.A., Miller, C.M., Loffredo, F.S., Wagers, A.J., Lee,



- 501 R.T., Chen, J.W., Wojtkiewicz, G.R., and Rubin, L.L. (2014). Vascular and Neurogenic  
502 Rejuvenation of the Aging Mouse Brain by Young Systemic Factors. *Science* (80-. ). *344*, 630–  
503 634.
- 504 Khrimian, L., Obri, A., Ramos-Brossier, M., Rousseaud, A., Moriceau, S., Nicot, A.-S., Karsenty,  
505 G., Gao, X.-B., Oury, F., Kosmidis, S., et al. (2017). Gpr158 mediates osteocalcin's regulation of  
506 cognition. *J. Exp. Med.* *214*, 2859–2873.
- 507 Kim, J., Basak, J.M., and Holtzman, D.M. (2009). The role of apolipoprotein E in Alzheimer's  
508 disease. *Neuron* *63*, 287–303.
- 509 Kimura, K.D., Tissenbaum, H.A., Liu, Y., and Ruvkun, G. (1997). Daf-2, an Insulin Receptor-  
510 Like Gene That Regulates Longevity and Diapause in *Caenorhabditis elegans*. *Science* (80-. ).  
511 *277*, 942 LP-946.
- 512 Lengfeld, J.E., Lutz, S.E., Smith, J.R., Diaconu, C., Scott, C., Kofman, S.B., Choi, C., Walsh,  
513 C.M., Raine, C.S., Agalliu, I., et al. (2017). Endothelial Wnt /  $\beta$  -catenin signaling reduces  
514 immune cell infiltration in multiple sclerosis.
- 515 Liebner, S., Corada, M., Bangsow, T., Babbage, J., Taddei, A., Czupalla, C.J., Reis, M., Felici,  
516 A., Wolburg, H., Fruttiger, M., et al. (2008). Wnt/ beta-catenin signaling controls development of  
517 the blood – brain barrier. *183*, 409–417.
- 518 Liguori, I., Russo, G., Curcio, F., Bulli, G., Aran, L., Della-Morte, D., Gargiulo, G., Testa, G.,  
519 Cacciatore, F., Bonaduce, D., et al. (2018). Oxidative stress, aging, and diseases. *Clin. Interv.*  
520 *Aging* *13*, 757–772.
- 521 Loffredo, F.S., Steinhauser, M.L., Jay, S.M., Gannon, J., Pancoast, J.R., Yalamanchi, P., Sinha,  
522 M., Dall'Osso, C., Khong, D., Shadrach, J.L., et al. (2013). Growth Differentiation Factor 11 Is a  
523 Circulating Factor that Reverses Age-Related Cardiac Hypertrophy. *Cell* *153*, 828–839.
- 524 López-Otín, C., Blasco, M.A., Partridge, L., Serrano, M., and Kroemer, G. (2013). The hallmarks  
525 of aging. *Cell* *153*.
- 526 Marques, F., Sousa, J.C., Sousa, N., and Palha, J.A. (2013). Blood – brain-barriers in aging and  
527 in Alzheimer ' s disease. *Mol. Neurodegener.* *8*, 1–9.
- 528 Mattson, M.P., and Magnus, T. (2006). Ageing and neuronal vulnerability. *Nat. Rev. Neurosci.* *7*,

- 529 278–294.
- 530 Milman, S., Huffman, D.M., and Barzilai, N. (2016). The Somatotrophic Axis in Human Aging:  
531 Framework for the Current State of Knowledge and Future Research. *Cell Metab.* 23, 980–989.
- 532 Montagne, A., Barnes, S.R., Sweeney, M.D., Halliday, M.R., Sagare, A.P., Zhao, Z., Toga,  
533 A.W., Jacobs, R.E., Liu, C.Y., Amezcua, L., et al. (2015). Blood-Brain barrier breakdown in the  
534 aging human hippocampus. *Neuron* 85, 296–302.
- 535 Mooradian, A.D. (1988). Effect of aging on the blood-brain barrier. *Neurobiol. Aging* 9, 31–39.
- 536 Murakami, K., Murata, N., Noda, Y., Tahara, S., Kaneko, T., Kinoshita, N., Hatsuta, H.,  
537 Murayama, S., Barnham, K.J., Irie, K., et al. (2011). SOD1 (copper/zinc superoxide dismutase)  
538 deficiency drives amyloid  $\beta$  protein oligomerization and memory loss in mouse model of  
539 Alzheimer disease. *J. Biol. Chem.* 286, 44557–44568.
- 540 Picelli, S., Faridani, O.R., Björklund, Å.K., Winberg, G., Sagasser, S., and Sandberg, R. (2014).  
541 Full-length RNA-seq from single cells using Smart-seq2. *Nat. Protoc.* 9, 171–181.
- 542 Ramilowski, J.A., Goldberg, T., Harshbarger, J., Kloppmann, E., Lizio, M., Satagopam, V.P.,  
543 Itoh, M., Kawaji, H., Carninci, P., Rost, B., et al. (2015). A draft network of ligand–receptor-  
544 mediated multicellular signalling in human. *Nat. Commun.* 6, 7866.
- 545 Reese, T.S., and Karnovsky, M.J. (2004). Fine Structural Localization of a Blood-Brain Barrier  
546 To Exogenous Peroxidase. *J. Cell Biol.* 34, 207–217.
- 547 Serra, V., von Zglinicki, T., Lorenz, M., and Saretzki, G. (2003). Extracellular Superoxide  
548 Dismutase Is a Major Antioxidant in Human Fibroblasts and Slows Telomere Shortening. *J. Biol.*  
549 *Chem.* 278, 6824–6830.
- 550 Silva-Vargas, V., Maldonado-Soto, A.R., Mizrak, D., Codega, P., and Doetsch, F. (2016). Age-  
551 Dependent Niche Signals from the Choroid Plexus Regulate Adult Neural Stem Cells. *Cell Stem*  
552 *Cell* 19, 643–652.
- 553 Smith, L.K., He, Y., Park, J.S., Bieri, G., Snethlage, C.E., Lin, K., Gontier, G., Wabl, R.,  
554 Plambeck, K.E., Udeochu, J., et al. (2015). B2-Microglobulin Is a Systemic Pro-Aging Factor  
555 That Impairs Cognitive Function and Neurogenesis. *Nat. Med.* 21, 932–937.

- 556 Sun, B.B., Maranville, J.C., Peters, J.E., Stacey, D., Surendran, P., Danesh, J., Roberts, D.J.,  
557 Fox, C.S., Oliver-Williams, C., Staley, J.R., et al. (2018). Genomic atlas of the human plasma  
558 proteome. *Nature* 558, 73–79.
- 559 Sweeney, M.D., Kisler, K., Montagne, A., Toga, A.W., and Zlokovic, B. V. (2018). The role of  
560 brain vasculature in neurodegenerative disorders. *Nat. Neurosci.* 21, 1318–1331.
- 561 Tanaka, T., Biancotto, A., Moaddel, R., Moore, A.Z., Gonzalez-Freire, M., Aon, M.A., Candia, J.,  
562 Zhang, P., Cheung, F., Fantoni, G., et al. (2018). Plasma proteomic signature of age in healthy  
563 humans. *Aging Cell* 17, 1–13.
- 564 Tatar, M., Kopelman, A., Epstein, D., Tu, M.-P., Yin, C.-M., and Garofalo, R.S. (2001). A Mutant  
565 *Drosophila* Insulin Receptor Homolog That Extends Life-Span and Impairs Neuroendocrine  
566 Function. *Science* (80-. ). 292, 107 LP-110.
- 567 Tran, K.A., Zhang, X., Predescu, D., and Huang, X. (2015). Endothelial  $\beta$ -Catenin Signaling Is  
568 Required for Maintaining Adult Blood – Brain Barrier Integrity and Central Nervous. 177–186.
- 569 Vanlandewijck, M., He, L., Mäe, M.A., Andrae, J., Ando, K., Del Gaudio, F., Nahar, K.,  
570 Lebouvier, T., Laviña, B., Gouveia, L., et al. (2018). A molecular atlas of cell types and zonation  
571 in the brain vasculature. *Nature* 554, 475–480.
- 572 Villeda, S.A., Luo, J., Mosher, K.I., Zou, B., Britschgi, M., Bieri, G., Stan, T.M., Fainberg, N.,  
573 Ding, Z., Eggel, A., et al. (2011). The ageing systemic milieu negatively regulates neurogenesis  
574 and cognitive function. *Nature* 477, 90–96.
- 575 Villeda, S.A., Plambeck, K.E., Middeldorp, J., Castellano, J.M., Mosher, K.I., Luo, J., Smith,  
576 L.K., Bieri, G., Lin, K., Berdnik, D., et al. (2014). Young blood reverses age-related impairments  
577 in cognitive function and synaptic plasticity in mice. *Nat. Med.* 20, 659–663.
- 578 Wang, Y., Sabbagh, M.F., Gu, X., and Rattner, A. (2019). Beta-catenin signaling regulates  
579 barrier- specific gene expression in circumventricular organ and ocular vasculatures. 1–36.
- 580 Wyss-Coray, T. (2016). Ageing, neurodegeneration and brain rejuvenation. *Nature* 539, 180–  
581 186.
- 582 Wyss-Coray, T., Masliah, E., Mallory, M., McConlogue, L., Johnson-Wood, K., Lin, C., and  
583 Mucke, L. (1997). Amyloidogenic role of cytokine TGF- $\beta$ 1 in transgenic mice and in Alzheimer's

584 disease. *Nature* 389, 603.

585 Yousef, H., Morgenthaler, A., Schlesinger, C., Bugaj, L., Conboy, I.M., and Schaffer, D. V  
586 (2015a). Age-Associated Increase in BMP Signaling Inhibits Hippocampal Neurogenesis. *Stem*  
587 *Cells* 33, 1577–1588.

588 Yousef, H., Conboy, M.J., Morgenthaler, A., Schlesinger, C., Bugaj, L., Paliwal, P., Greer, C.,  
589 Conboy, I.M., Schaffer, D., Yousef, H., et al. (2015b). Systemic attenuation of the TGF- $\beta$   
590 pathway by a single drug simultaneously rejuvenates hippocampal neurogenesis and  
591 myogenesis in the same old mammal. *Oncotarget* 6, 11959–11978.

592 Yousef, H., Czapalla, C.J., Lee, D., Burke, A., Chen, M., Zandstra, J., Berber, E., Lehallier, B.,  
593 Mathur, V., Nair, R. V, et al. (2018a). Aged blood inhibits hippocampal neurogenesis and  
594 activates microglia through VCAM1 at the blood-brain barrier. *BioRxiv*.

595 Yousef, H., Czapalla, C., Wyss-Coray, T., and Butcher, E. (2018b). Papain-based Single Cell  
596 Isolation of Primary Murine Brain Endothelial Cells Using Flow Cytometry. *Bio-Protocol* 8, 1–12.

597 Zhao, Z., Nelson, A.R., Betsholtz, C., and Zlokovic, B. V. (2015). Establishment and Dysfunction  
598 of the Blood-Brain Barrier. *Cell* 163, 1064–1078.

599 Zhou, Y., and Nathans, J. (2014). Short Article Gpr124 Controls CNS Angiogenesis and Blood-  
600 Brain Barrier Integrity by Promoting. *Dev. Cell* 31, 248–256.

601 Zlokovic, B. V. (2008). The Blood-Brain Barrier in Health and Chronic Neurodegenerative  
602 Disorders. *Neuron* 57, 178–201.

603

604

605

606

607

608

609 **FIGURE LEGENDS**

610

611 **Fig 1. Brain endothelial cells segment into arterial, capillary, and venous identities**

- 612 a. Schematic of experimental protocol for single-cell analyses of BEC transcriptome.
- 613 b. (Top panel) tSNE of a subset (179) of 3 m.o. BECs collected in an unbiased manner  
614 (CD31+) and non-discrete expression pattern (*logcpm*) of key A-C-V genes including *Bmx*  
615 (arterial), *Slc16a1* (capillary), *Nr2f2* (venous), and *Vcam1* (arterial & venous). Note the low  
616 number of *Vcam1* + cells and the absence of a clear venous EC population. (Bottom panel)  
617 Addition of a subset of *Vcam1*+ cells into PCA analysis (62, as collected by FACs enrichment)  
618 significantly improves A-C-V identification.
- 619 c. Calling of arterial, venous and capillary populations after the addition of *Vcam1*+ cells.  
620 Pie charts of the proportion of ACV cells in unbiased CD31 sorts, in VCAM1+/CD31+ sorts, and  
621 unbiased with 25% of VCAM1+ cell enrichment (final condition).
- 622 d. Heatmap of the top 25 most enriched genes per A-C-V population (which were identified  
623 via unbiased whole transcriptome clustering) in young BECs.
- 624 e. Barplots of the expression level of top genes which may act as novel markers for A and  
625 V identities. Genes encoding for cell surface receptors are indicated by \*R. Expression levels in  
626 A-C-V segments are validated for the full set of 981 3 m.o. BECs (over 4 biological replicates).  
627

628 **Fig 2. Systemic LPS administration activates common transcriptional programs across**  
629 **segment identities**

- 630 a. Venn diagram showing the number of DEGs (FDR<0.05) shared between each vessel  
631 segment. Heatmap showing the distribution of up- and down-regulated genes per vessel  
632 segment. Dotted heatmap of top 60 DEGs ranked by  $\text{avg\_logFC} \cdot -\log_{10}(\text{FDR})$ . Color indicates  
633 the average log fold change of LPS/untreated, while the dot size represents degree of statistical  
634 significance. Only genes with FDR<0.05 for at least one vessel segment is listed, and  
635 hierarchical clustering is performed (dot size = 0 indicates FDR>0.05).
- 636 b. GO enrichment analysis of the list of DEGs (FDR<0.05) up- and down- regulated in LPS  
637 treated A, C and V cells. Left hand side (red) indicates pathways that are over-represented by  
638 DEGs upregulated with LPS, right hand side (blue) indicates pathways over-represented by  
639 DEGs down-regulated with LPS treatment. Exemplary genes contributing to pathway  
640 enrichment in the upregulated DEG set is listed on the side.

641 c. Density plots of key genes from (a) showing the single cell distributions of expression  
642 levels in A, C and V segments. Dotted lines indicate median of the LPS or untreated sample  
643 distributions. All comparisons shown between LPS and untreated are significant ( $p < 0.05$ ).  
644

645 **Fig 3. Healthy aging of BECs results in transcriptome changes that are distinct across**  
646 **segment identities**

647

648 a. tSNE after aligning healthy aged and young datasets via Canonical Correlation Analysis  
649 (CCA), using the top 9 correlation components. Aged and young cells show comparable  
650 distribution of A, C, and V identities along the A-C-V axis. Note that segmental identity largely  
651 drives cluster formation, rather than age group.

652 b. Distribution of key A-C-V marker genes in tSNE-space.

653 c. Venn diagram showing the numbers of DEGs (FDR $<0.1$ ) shared between different  
654 vessel segments. Heatmap of the union of all DEGs up- and down- regulated in aged A, C, or V  
655 cells, illustrating the degree of overlap of DEGs between each segment.

656 d. Dotted heatmap of top 80 DEGs ranked by  $\text{avg\_logFC} \cdot \text{-log}_{10}(\text{FDR})$  (a subset of genes  
657 in (c). Color indicates the average log fold change of Aged/Young, while the dot size represents  
658 degree of statistical significance. Any gene with FDR $<0.1$  for at least one vessel segment is  
659 listed, and hierarchical clustering is performed (dot size = 0 indicates FDR $>0.1$ ).

660 d. GO analysis of all DEGs (FDR $<0.1$ ) up- and down- regulated in aged A, C and V cells.  
661 Left hand side (red) indicates pathways over-represented by genes upregulated with aging, right  
662 hand side (blue) indicates pathways over-represented by genes down-regulated with aging.  
663 Exemplary genes contributing to pathway enrichment in the upregulated DEG set is listed on the  
664 side.

665 e. Density plots of key genes from (d) showing the single cell distributions of expression  
666 levels in A, C and V segments. Dotted lines indicate median of the young or aged distribution.  
667 \* $p < 0.1$ , \*\* $p < 0.01$ , \*\*\* $p < 0.001$ .

668

669 **Fig 4. BECs sense cues in the circulatory milieu - aged plasma recapitulates signatures**  
670 **of healthy aging**

671 a. Schematic of the AMP acute infusion into young mice paradigm.

- 672 b. tSNE after aligning AMP and PBS treated datasets via Canonical Correlation Analysis  
673 (CCA), using the top 9 correlation components (CCs). AMP and PBS treated cells show  
674 comparable distribution of A, C, and V identities along the A-C-V axis, suggesting plasma  
675 infusions do not significantly alter native segmental identities.
- 676 c. Barplot of expression level of canonical A-C-V marker genes in all AMP and PBS treated  
677 BECs, with segmental identity defined by unbiased clustering in (b).
- 678 d. Volcano plot depicting up- and down-regulated genes with AMP treatment in capillaries  
679 only (compared to PBS control). Genes marked in red are significant ( $FDR < 0.1$ ). FDR values  
680 are calculated only with genes showing an  $avg\_logFC > 0.1$ . Genes labeled red are  $FDR < 0.1$ .
- 681 e. Dotted heatmap of top 60 DEGs ranked by  $avg\_logFC * -log_{10}(FDR)$  (a subset of genes  
682 in (c). Color indicates the average log fold change of AMP/PBS, while the dot size represents  
683 degree of statistical significance. Any gene with  $FDR < 0.1$  for at least one vessel segment is  
684 listed, and hierarchical clustering is performed (dot size = 0 indicates  $FDR > 0.1$ ).
- 685 f. Scatterplot of genes and their log fold change in both healthy Aged/Young and  
686 AMP/PBS treatment in capillaries. The 153 genes that are commonly up- (blue) or  
687 downregulated (green) in both groups (and satisfy  $FDR < 0.1$  in both), are labeled. These genes  
688 are more likely ones that are modulated by aged plasma factors in a normal aged milieu, rather  
689 than ones specifically upregulated by plasma treatment, and unrelated to normal aging. Inset  
690 shows the same genes (red) on a plot of the signed-FDR value (sign of  $logFC * -log_{10}(FDR)$ ).
- 691 g. Top pathways represented by the genes which are both upregulated in healthy aging  
692 and AMP treatment (149 intersecting DEGs).
- 693

694 ***Fig 5. YMP plasma infusion reverses select signatures of normal BEC aging***

- 695 a. Schematic of the YMP acute infusion into aged mice paradigm.
- 696 b. tSNE after aligning YMP and PBS treated datasets via Canonical Correlation Analysis  
697 (CCA), using the top 9 correlation components (CCs). YMP and PBS treated cells show  
698 comparable distribution of A, C, and V identities along the A-C-V axis, suggesting plasma  
699 infusions do not significantly alter native segmental identities.
- 700 c. Barplot of expression level of canonical A-C-V marker genes in all YMP and PBS treated  
701 BECs, with segmental identity defined by unbiased clustering in (b).
- 702 d. Volcano plot of DEGs up- and down- regulated with YMP treatment (vs PBS control).  
703 FDR values are calculated only with genes showing an  $avg\_logFC > 0.1$ . Genes labeled red are  
704  $FDR < 0.1$ .

705 e. Scatterplot of genes and their log fold change in both healthy Aged/Young and  
706 YMP/PBS treatment in capillaries. The 89 genes that are upregulated with age (Aged/Young),  
707 but decreased with YMP (YMP/PBS) and vice-versa (and satisfy  $FDR < 0.1$  in aging and  
708  $FDR < 0.1$  in YMP), are labeled. It is likely that these genes upregulated in normal aging are able  
709 to be modulated and/or reversed with exposure to YMP. Inset shows the same genes (red) on a  
710 plot of the signed-FDR value (sign of  $\log FC * -\log_{10}(FDR)$ ).

711 f. Top pathways represented by the genes which are upregulated in healthy aging and  
712 downregulated with YMP treatment (89 intersecting DEGs).

713

714 **Fig 6. Young plasma administrations can rejuvenate BECs aging signatures that are**  
715 **induced by aged plasma**

716

717 a. Venn diagram depicting the number of DEGs shared between each treatment condition  
718 (Aged/Young, AMP/PBS, YMP/PBS). Of all DEGs, 42 genes are differentially expressed in all  
719 three treatment groups (that is, increasing with both normal aging and AMP, and decreasing  
720 with YMP).

721 b. Bar plot of the top selected biological pathways that are enriched when analyzing either  
722 the intersecting DEGs between aging and AMP (149 DEGs) or the intersecting DEGs between  
723 aging and YMP (89). Score is derived from GeneAnalytics software. Several pathways affected  
724 are shared, suggesting that YMP can reverse some transcriptional consequences of AMP  
725 treatment and normal aging. Select genes involved in each pathway are depicted, with DEGs  
726 intersecting in all three treatments labeled in red.

727 c. Bar plot of the log fold change of top DEGs that intersect in all three treatments  
728 (Aged/Young, AMP/PBS, YMP/PBS). These genes are most likely to be those that are  
729 modulated by aged plasma factors in a normal aged milieu, and that this effect can be reversed  
730 with exposure to young plasma factors.

731 d. Sankey plot depicting relationships between DEGs which code for BEC surface receptor  
732 or membrane proteins, and their corresponding ligands. Directionality of BEC surface protein  
733 coding genes in each condition (normal aging, AMP, YMP) are denoted with arrows.  
734 Corresponding ligands found significantly up (red) or down (blue) regulated with age in mouse  
735 plasma as measured by SOMALogic are highlighted.

736

737



738 **METHODS**

739

740 *Animals*

741 Aged C57BL6J males were obtained from the National Institute on Aging (NIA), and young  
742 C57BL6J males (2-4 months of age) were purchased from Charles River. Mice were housed  
743 under a 12-hour light-dark cycle in pathogenic-free conditions, in accordance with the Guide for  
744 Care and Use of Laboratory Animals of the National Institutes of Health.

745

746 Plasma collection, dialysis and processing

747 Mouse: Approximately 500 µl of blood was drawn from the heart in 250 mM EDTA (Sigma Aldrich,  
748 CAS Number: 60-00-4) and immediately transferred to ice. Blood was centrifuged at 1000g for 10  
749 min at 4°C with a break set to 5 or less. Plasma was collected and immediately snap frozen on  
750 dry ice and stored at -80°C until further processing. Plasma was dialyzed in 4L of 1X PBS (51226,  
751 Lonza) stirred at room temperature. Plasma was transferred to a fresh 4L of 1 X PBS after 45 min  
752 and then again 20 min later. After the second transfer, plasma was dialyzed overnight at 4°C in 4  
753 L of stirred 1X PBS. Plasma from 7-9 mice was pooled for injections.

754

755 Plasma injections in young and aged mice

756 Young (3-month-old) C57BL6J male mice were treated with 7 injections of aged (18-month-old)  
757 or young (3-month-old) dialyzed and pooled mouse plasma (150 uL, r.o.), coming from 8-10 mice  
758 per pooled plasma sample as recently described (Yousef et al., 2019). Mice were treated acutely  
759 over 4 days, with 2 injections per day spaced 10-12 hours apart. Mice received a 7<sup>th</sup> plasma  
760 injection on day 4 followed by perfusion 3 hours after the last injection. Aged (19-month-old)  
761 C57BL6J mice were treated with young (3-month) plasma in the same manner.

762

763 LPS Injections

764 Mice were injected with Lipopolysaccharide (LPS) derived from Salmonella enterica Serotype  
765 Typhimurium (Sigma, L6511), i.p. 1 mg LPS/kg body weight at three successive time points: 0h,  
766 6h, and 24h <sup>85</sup>. Control mice were injected with bodyweight corresponding volumes of PBS.  
767 Experimental mice received i.p. and s.c. injections of sterile 0.9% saline with 5% glucose to ensure  
768 hydration and stable glucose levels during the procedure. Two hours after the last LPS injection  
769 (26h) mouse brains were harvested for BEC isolation and flow analysis.

770

771 *Primary BEC isolation and enrichment of CD31+VCAM1+ cells:*

772 BEC isolation was based on a previously described procedure(Yousef et al., 2018b). Briefly, mice  
773 were anesthetized with avertin and perfused following blood collection. After thoroughly dissecting  
774 the meninges, hippocampi were collected, minced and digested using the neural dissociation kit  
775 according to kit instructions (Miltenyi, 130-092-628). Brain homogenates were filtered through 35  
776  $\mu\text{m}$  in HBSS and centrifuged pellets were resuspended in 0.9 M sucrose in HBSS followed by  
777 centrifugation for 15 min at 850xg at 4°C in order to separate the myelin. This step was repeated  
778 for better myelin removal.

779  
780 Cell pellets were eluted in FACs buffer (0.5% BSA in PBS with 2mM EDTA) and blocked for ten  
781 min with Fc preblock (CD16/CD32, BD 553141), followed by 20 minute staining with anti-CD31-  
782 APC (1:100, BD 551262), anti-CD45-FITC or anti-CD45-APC/Cy7 (1:100, BD Pharmingen Clone  
783 30-F11 553080; Biolegend, 103116), and anti-Cd11b-BV421 (1:100, Biolegend Clone M1/70  
784 101236). Dead cells were excluded by staining with propidium iodide solution (1:3000, Sigma,  
785 P4864). Flow cytometry data and cell sorting were acquired on an ARIA II (BD Biosciences) with  
786 FACSDiva software (BD Biosciences). FlowJo software was used for further analysis and  
787 depiction of the gating strategy. Gates are indicated by framed areas. Cells were gated on forward  
788 (FSC = size) and sideward scatter (SSC = internal structure). FSC-A and FSC-W blotting was  
789 used to discriminate single cells from cell doublets/aggregates. PI+ dead cells were excluded.  
790 CD11b+ and CD45+ cells were gated to exclude monocytes/macrophages and microglia.  
791 CD31+CD11b-CD45- cells were defined as the BEC population and were sorted directly into lysis  
792 buffer in 96 or 384 well plates (Biorad), containing RNAase inhibitor, oligodT, dNTPs and ERCC  
793 spike-ins (Picelli et al, 2016), and stored at -80 for further processing. If mice were injected with  
794 fluorescently labeled anti-mouse VCAM1- DyLight™488 as described above, CD45 was stained  
795 in the APC/Cy7 channel, and CD31+VCAM1+ cells were also gated in the APC and FITC  
796 channels.

797  
798 *Anti-VCAM1 antibody in vivo retro-orbital injections to label CD31+VCAM1+ BECs*

799 Enrichment and gating of VCAM1+ cells was done as previously described(Yousef et al., 2018b).  
800 Mice were injected with LPS as described above. When mice received a third LPS injection (24  
801 h), it was followed by retro-orbital injections of either 100 $\mu\text{g}$  fluorescently labeled (DyLight™488,  
802 Thermo Scientific, 53025) InVivoMAb anti-mouse CD106 (VCAM-1, clone M/K-2.7, Bioxell,  
803 BE0027) or fluorescently labeled Rat IgG1 Isotype antibody (Clone HRPN, Bioxell, BE0088). Two  
804 hours after the last LPS injection (26h) mouse brains were harvested for BEC isolation and flow  
805 analysis.

806 Healthy young (3-month-old), aged (19-month-old), or plasma injected (r.o.) young mice were  
807 similarly injected (r.o.) with fluorescently labeled anti-VCAM1 mAb and gated for flow cytometry  
808 analysis of CD31+VCAM1+ cells from hippocampi. Gates are based on positive LPS-stimulated  
809 mice injected (r.o.) with anti-VCAM1 or IgG control.

810

#### 811 *FACs enrichment of VCAM1 positive BECs*

812 4 young (3-month-old) or 4 aged (19-month-old) C57BL6/J males were injected (r.o.) with  
813 fluorescently labeled anti-VCAM1 mAb 2 hours prior to sacrifice and gated for single cell isolation  
814 of CD31+VCAM1+ cells from pooled hippocampi following perfusion. Gates are based on positive  
815 LPS-stimulated mice injected with fluorescently labeled (DL488) anti-VCAM1 mAb or IgG-DL488  
816 control antibody.

817 Four hippocampi (from both hemispheres) were pooled together from 4 young (3-month-old) or 4  
818 aged (19-month-old) C57BL6/J males and sorted into lysis buffer in 96-well plates then snap  
819 frozen and stored at -80 degrees Celsius until RNA extraction and library preparation. Two, 96-  
820 well plates per group contained BECs that were 50% enriched for VCAM1 high expression based  
821 on flow cytometry gating; unbiased CD31+ cells were also collected into two, 96-well plates per  
822 group.

823

#### 824 *Single cell RNA-sequencing*

825 Cell lysis, first-strand synthesis and cDNA synthesis was performed using the Smart-seq-2  
826 protocol as described previously (Picelli et al., 2014) in both 96-well and 384-well formats, with  
827 some modifications. After cDNA amplification (23 cycles), cDNA concentrations were determined  
828 via capillary electrophoresis (96-well format) or the PicoGreen quantitation assay (384-well  
829 format) and wells were cherry-picked to improve quality and cost of sequencing. Cell selection  
830 was done through custom scripts and simultaneously normalizes cDNA concentrations to ~0.2  
831 ng/uL per sample, using the TPPLabtech Mosquito HTS and Mantis (Formulatrix) robotic  
832 platforms. Libraries were prepared and pooled using the Illumina Nextera XT kits or and in-house  
833 Tn5, following the manufacturer's instructions. Libraries were then sequenced on the Nextseq or  
834 Novaseq (Illumina) using 2 x 75bp paired-end reads and 2 x 8bp index reads with a 200 cycle kit  
835 (Illumina, 20012861). Samples were sequenced at an average of 1.5M reads per cell.

836

837

838

839

840 *Bioinformatics and data analysis*

841

842 Sequences from the Nextseq or Novaseq were demultiplexed using bcl2fastq, and reads were  
843 aligned to the mm10 genome augmented with ERCC sequences, using STAR version 2.5.2b.  
844 Gene counts were made using HTSEQ version 0.6.1p1. All packages were called an run through  
845 a custom Snakemake pipeline. We applied standard algorithms for cell filtration, feature selection,  
846 and dimensionality reduction. Briefly, genes appearing in fewer than 5 cells, samples with fewer  
847 than 100 genes, and samples with less than 50,000 reads were excluded from the analysis. Out  
848 of these cells, those with more than 30% of reads as ERCC, and more than 10% mitochondrial  
849 or 10% ribosomal were also excluded from analysis. Counts were log-normalized then scaled.

850

851 Next, the *Canonical Correlation Analysis* function from the Seurat package (Butler et al., 2018)  
852 was used to align raw data from multiple experiments, data from aged vs young mice, AMP vs  
853 YMP treated young mice, and LPS treated vs untreated mice. Only the first 10 Canonical  
854 Components (CCs) were used. After alignment, relevant features were selected by filtering  
855 expressed genes to a set of ~3000 with the highest positive and negative pairwise correlations.  
856 Genes were then projected into principal component space using the robust principal component  
857 analysis (rPCA). Single cell PC scores and genes loadings for the first 20 PCs were used as  
858 inputs into Seurat's (v2) *FindClusters* and *RunTsne* functions to calculate 2-dimensional tSNE  
859 coordinates and search for distinct cell populations. Briefly, a shared-nearest-neighbor graph was  
860 constructed based on the Euclidean distance metric in PC space, and cells were clustered using  
861 the Louvain method. Cells and clusters were then visualized using 3-D t- distributed Stochastic  
862 Neighbor embedding on the same distance metric. Differential gene expression analysis was  
863 done by applying the Mann-Whitney U-test of the BEC clusters obtained using unsupervised  
864 clustering. Raw p-values were adjusted via the false discovery rate (FDR). Permutation tests were  
865 then performed on all genes of interest. All graphs and analyses were generated and performed  
866 in R. GeneAnalytics and GeneCards- packages offered by Gene Set Enrichment Analysis (GSEA)  
867 tool was used for GO/KEGG/REACTOME pathway analysis and classification of enriched genes  
868 in each subpopulation.

Figure 1

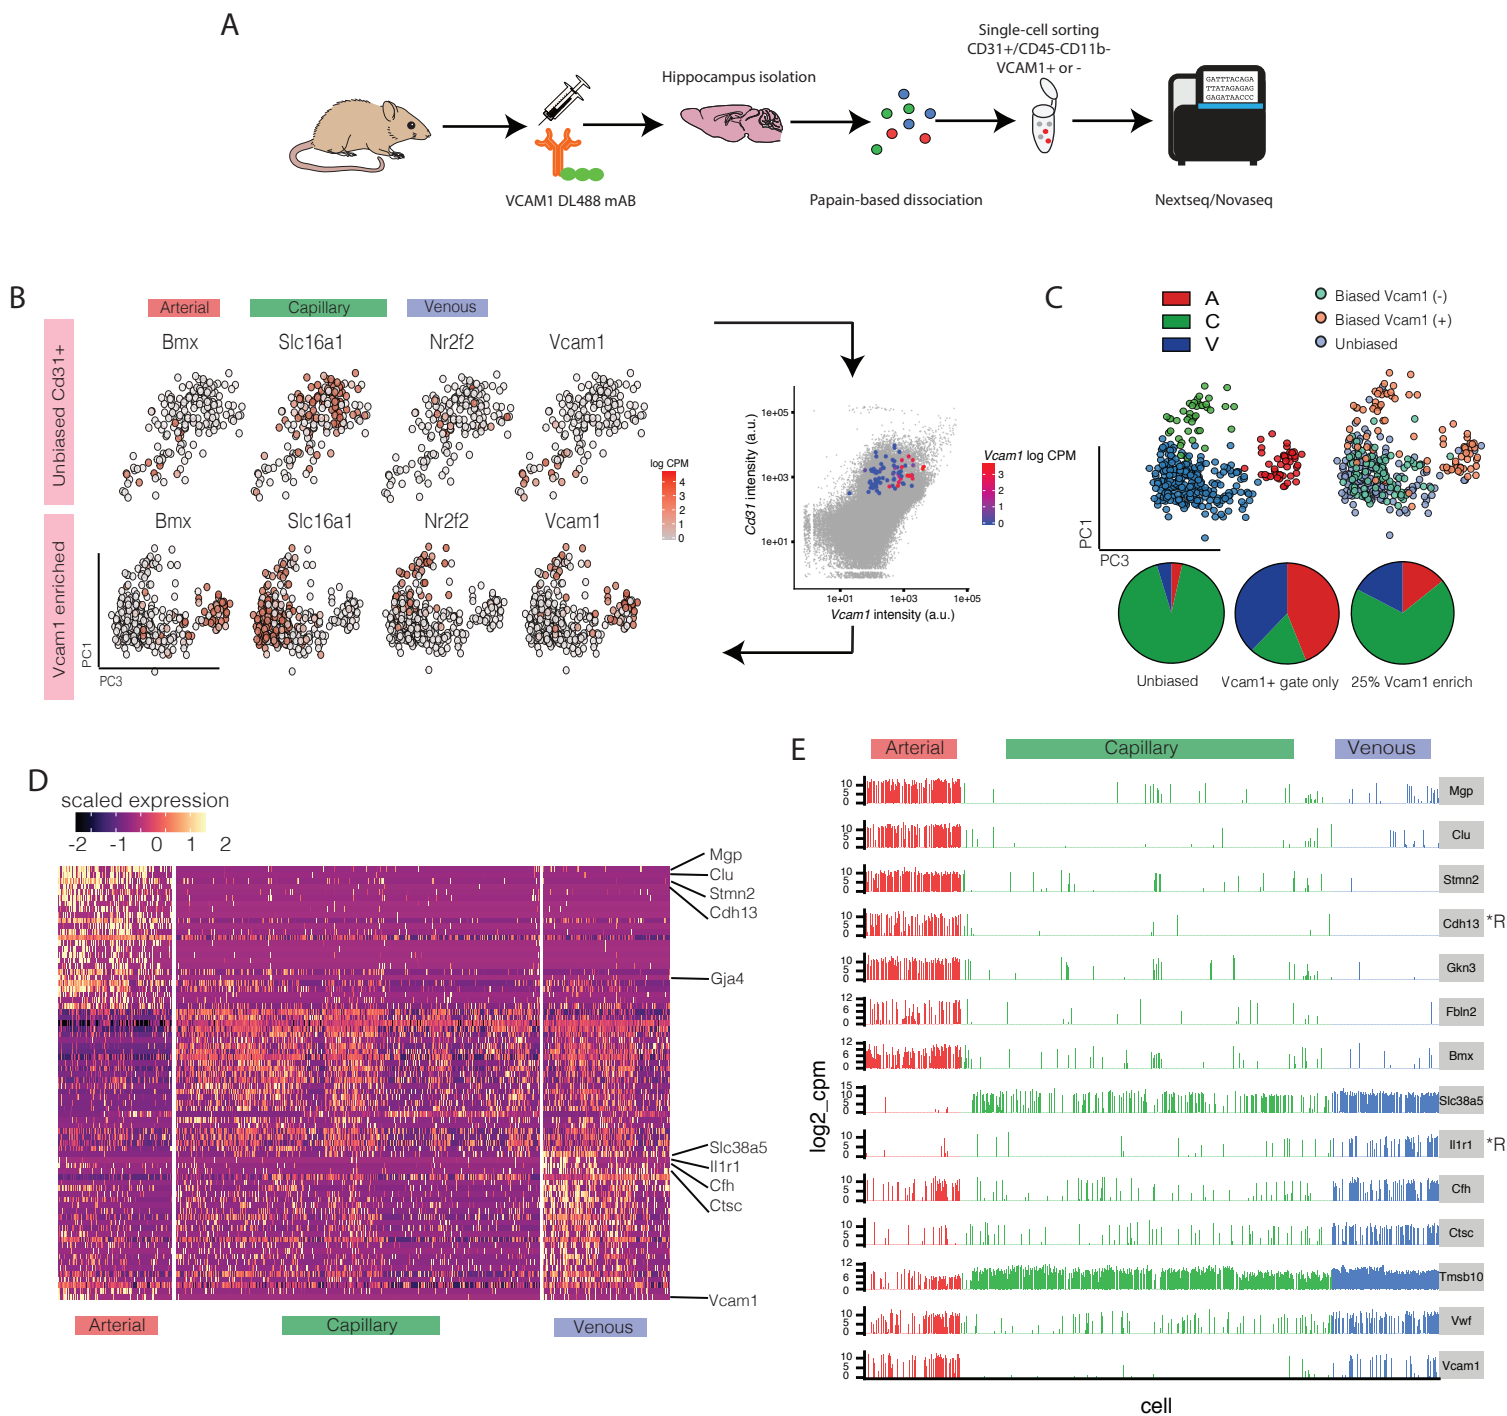

Figure 2

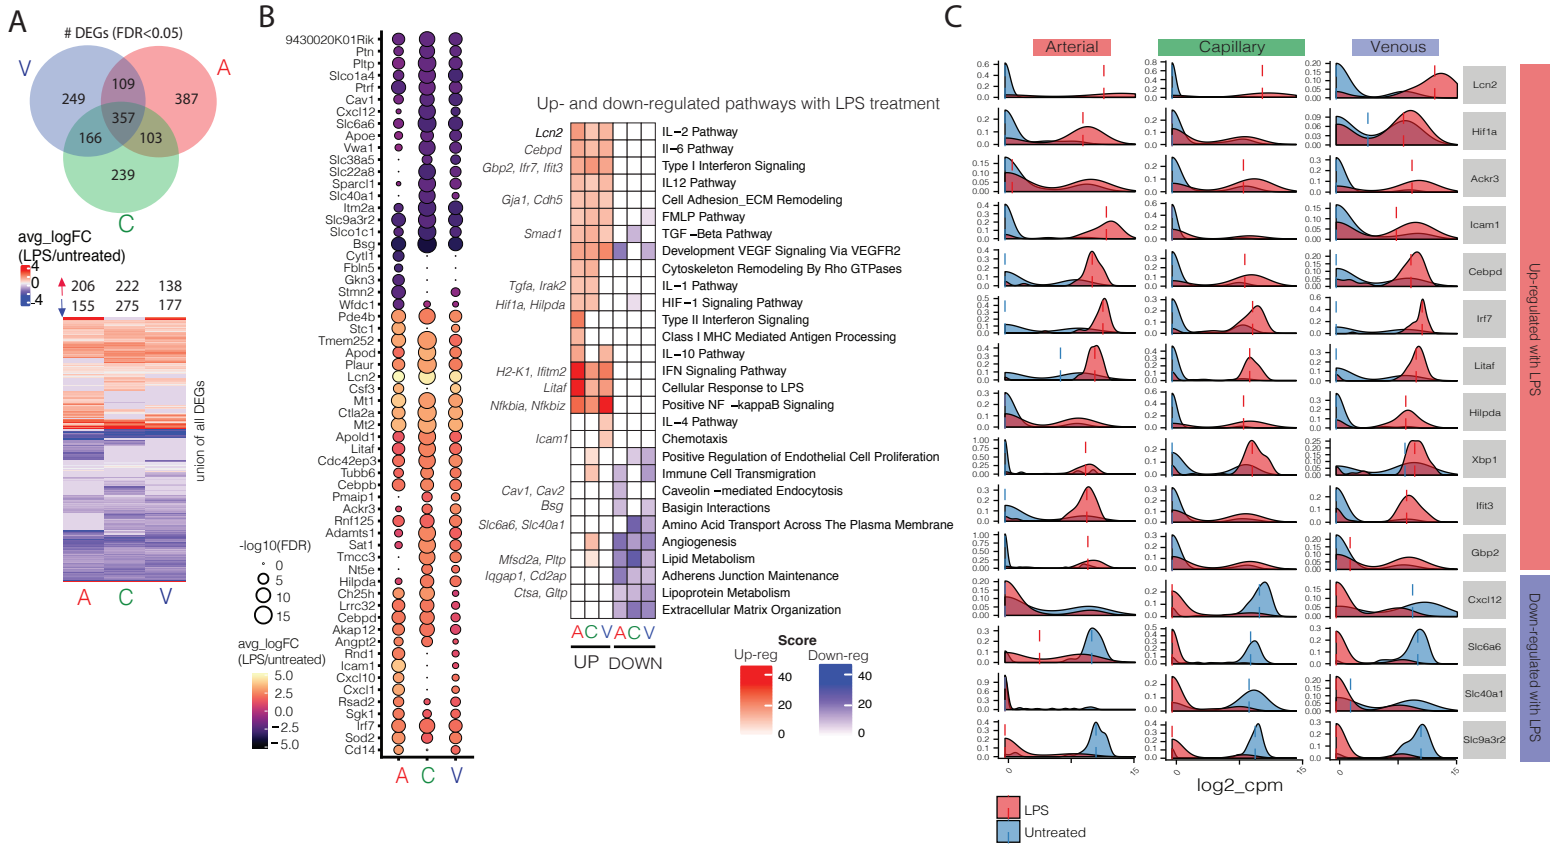

Figure 3

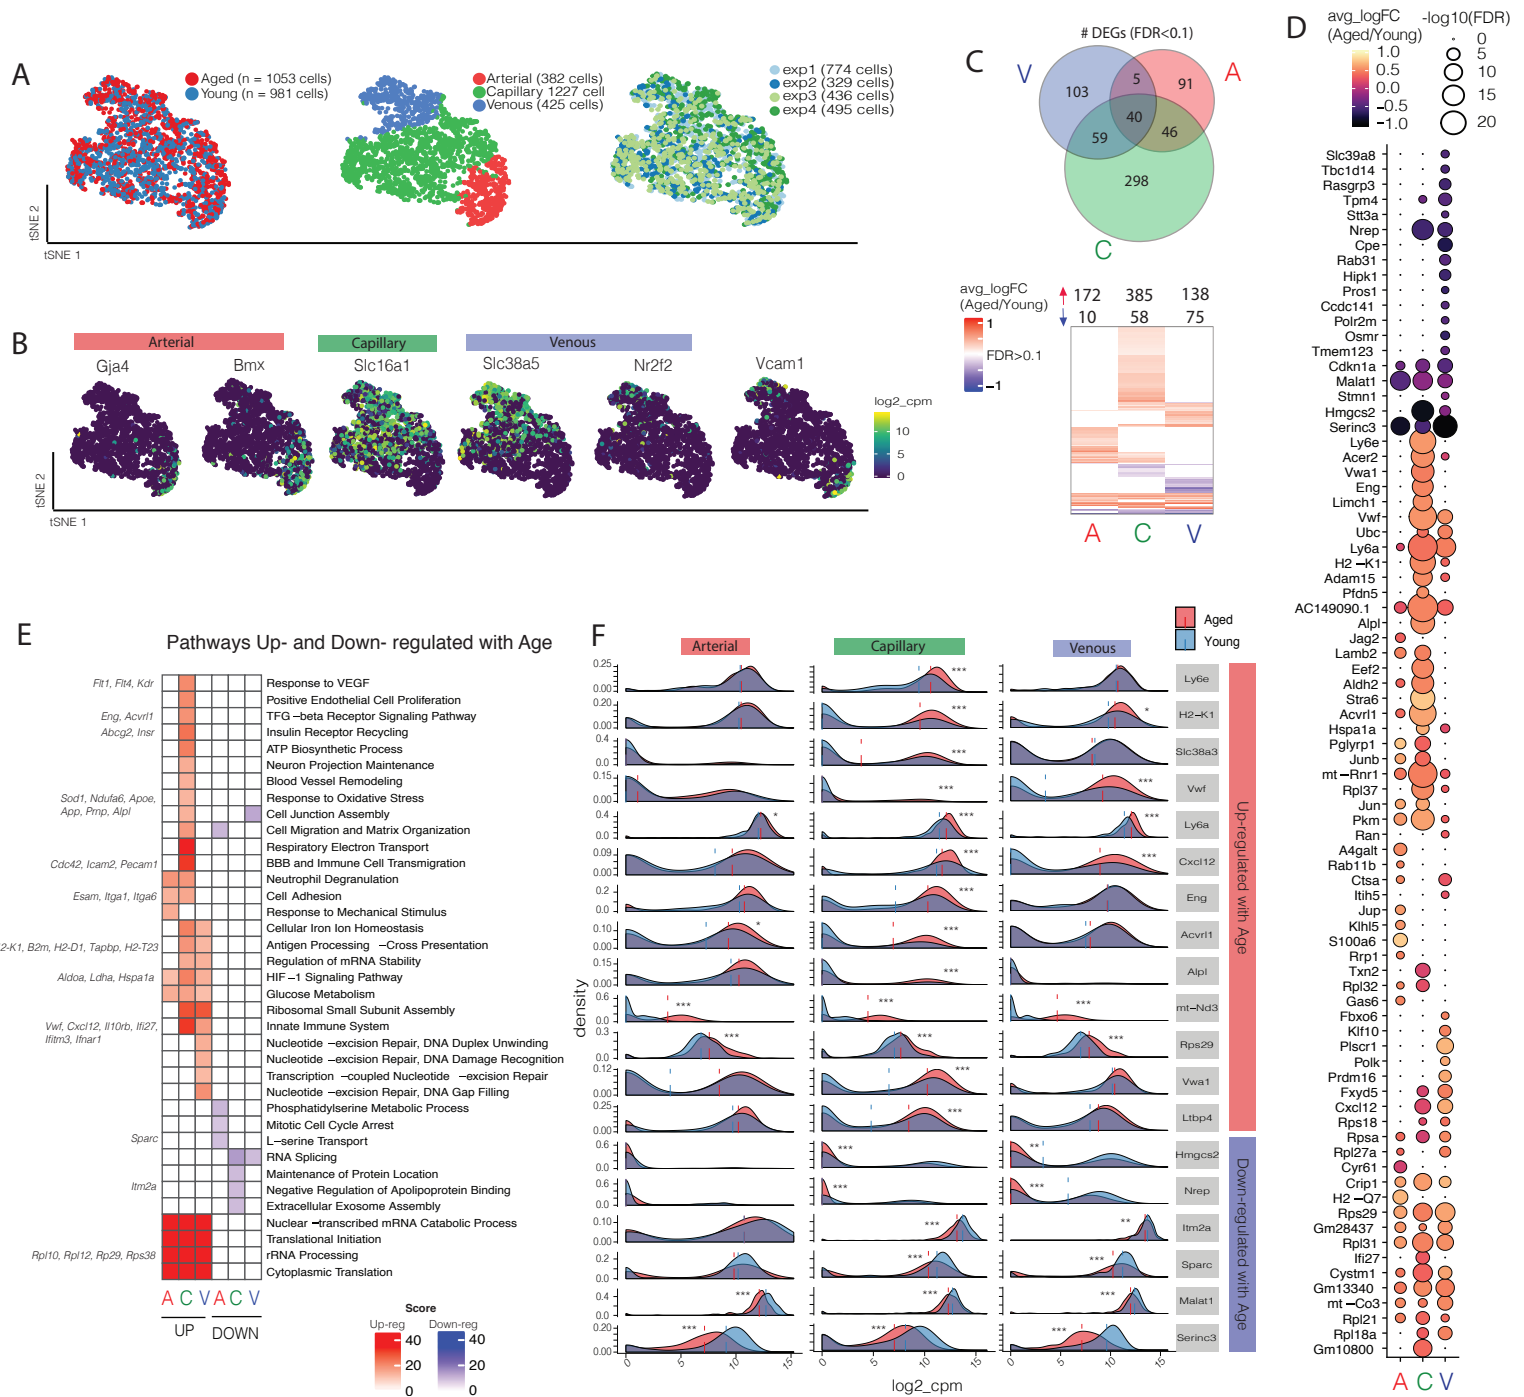

Figure 4

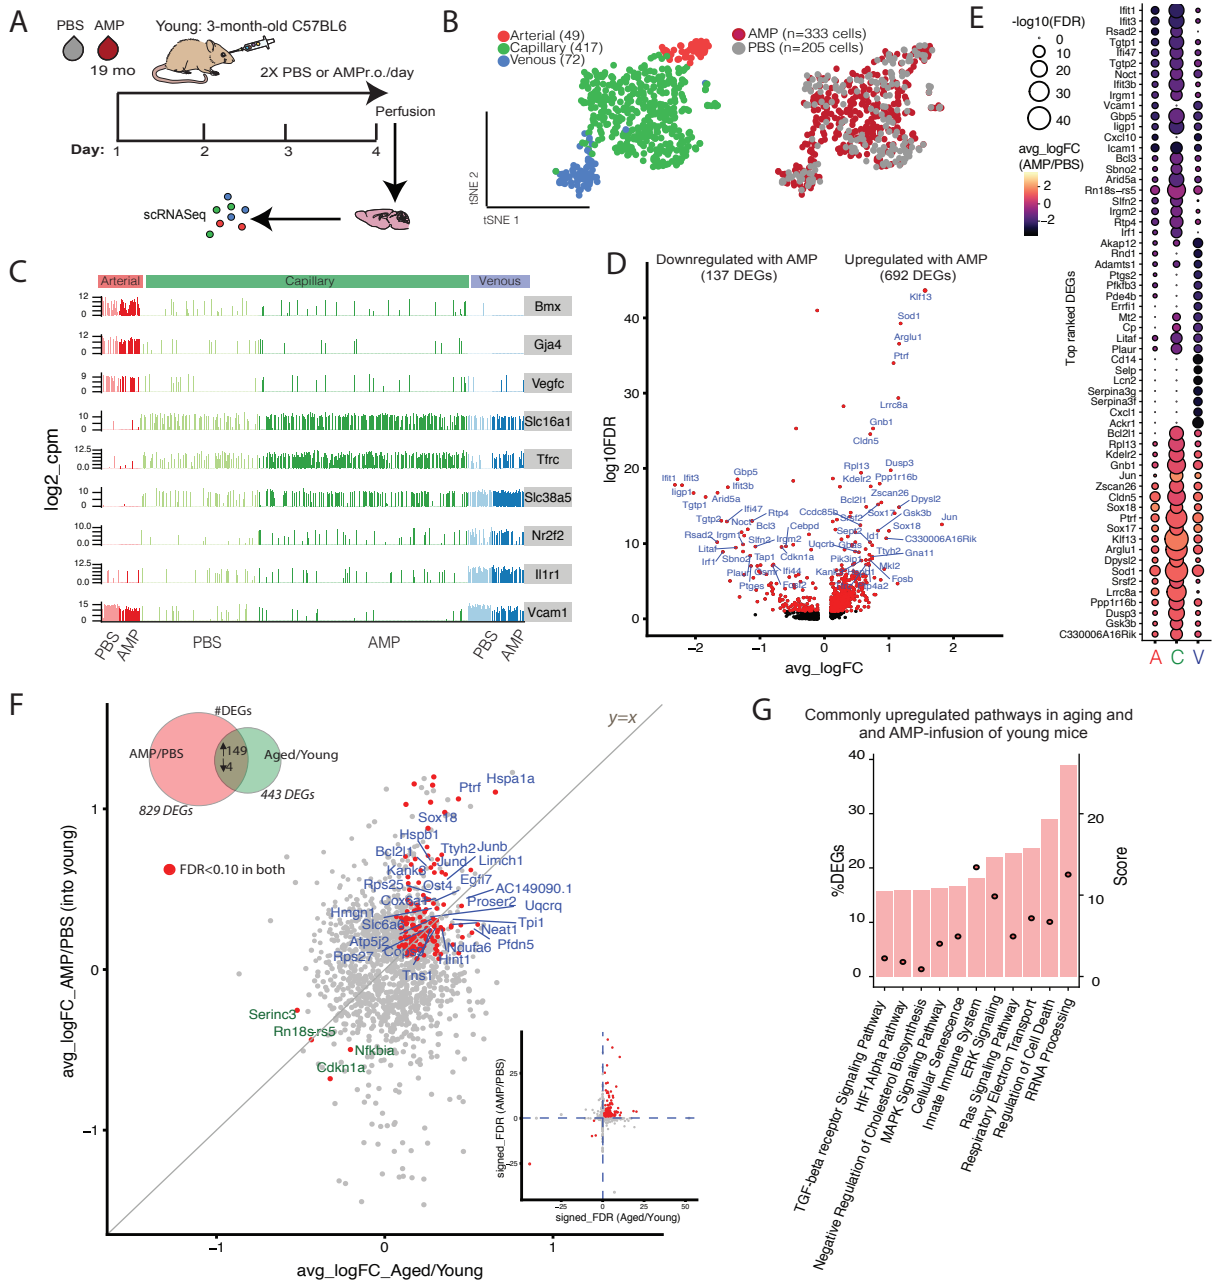



Figure 5

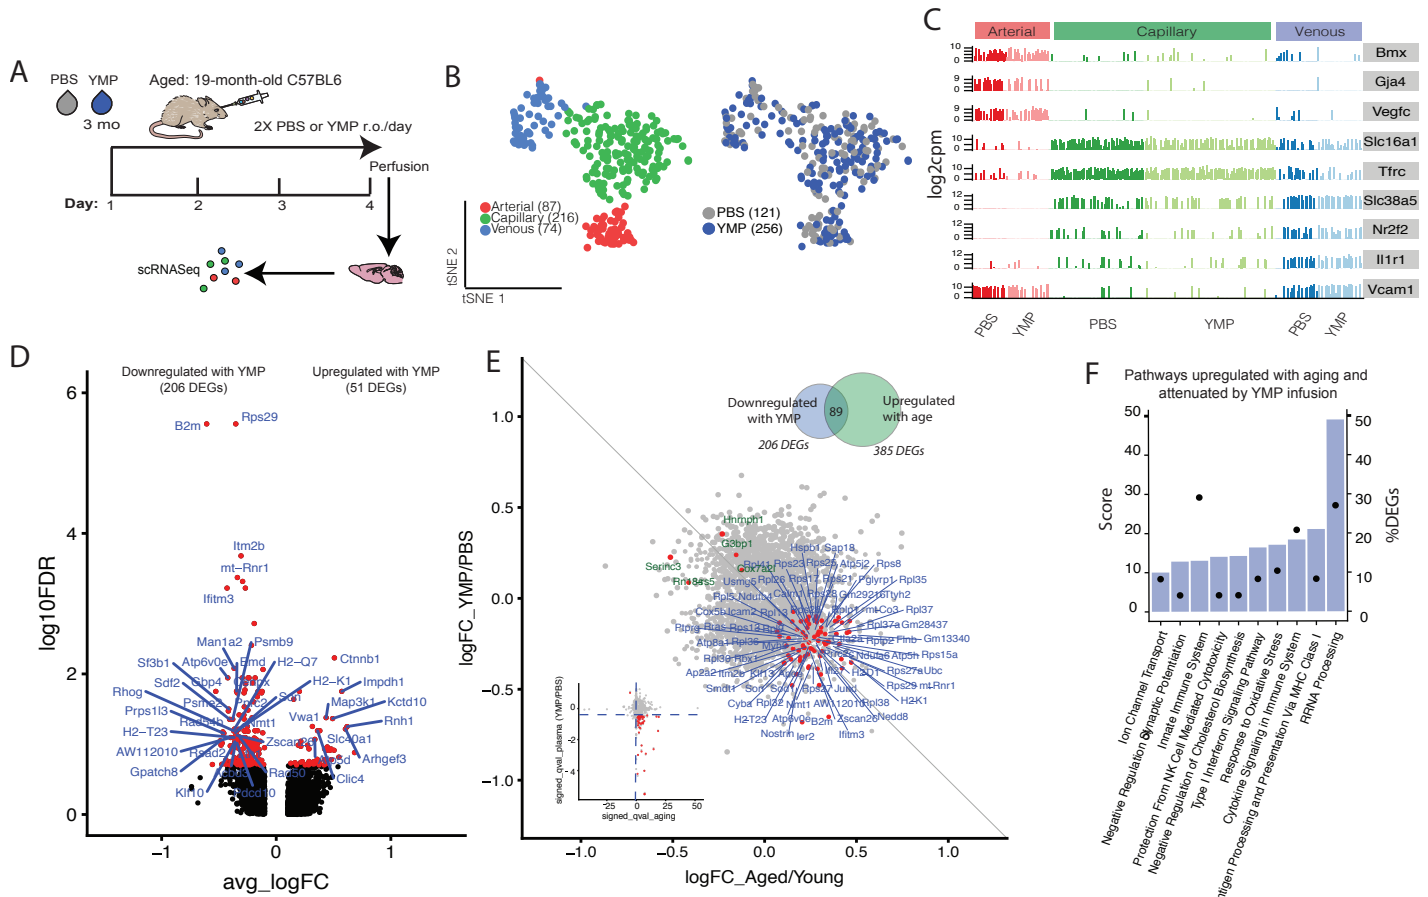

Figure 6

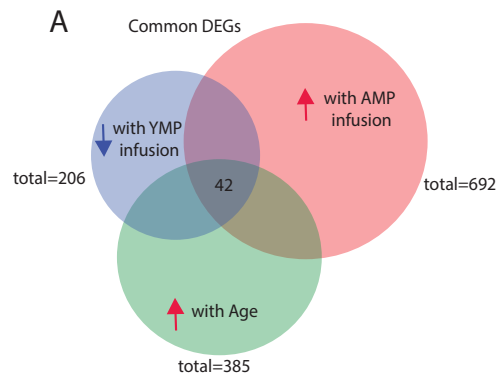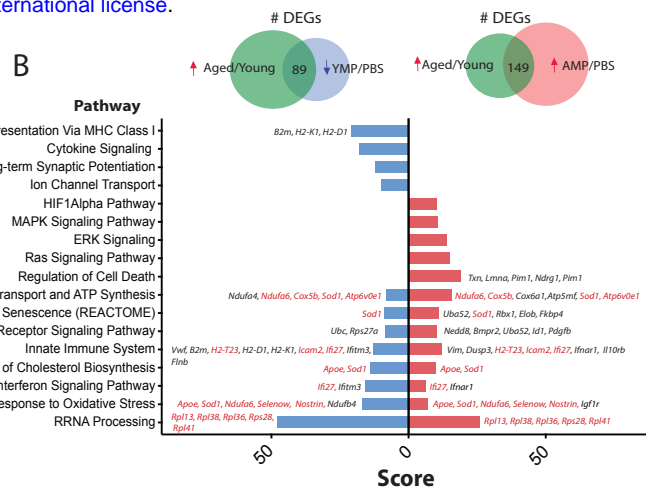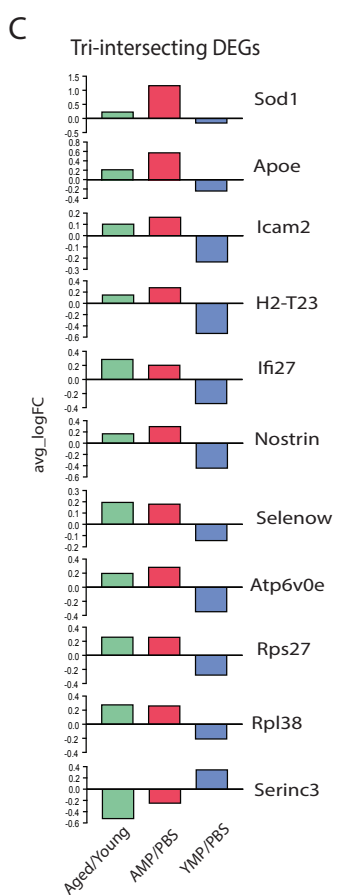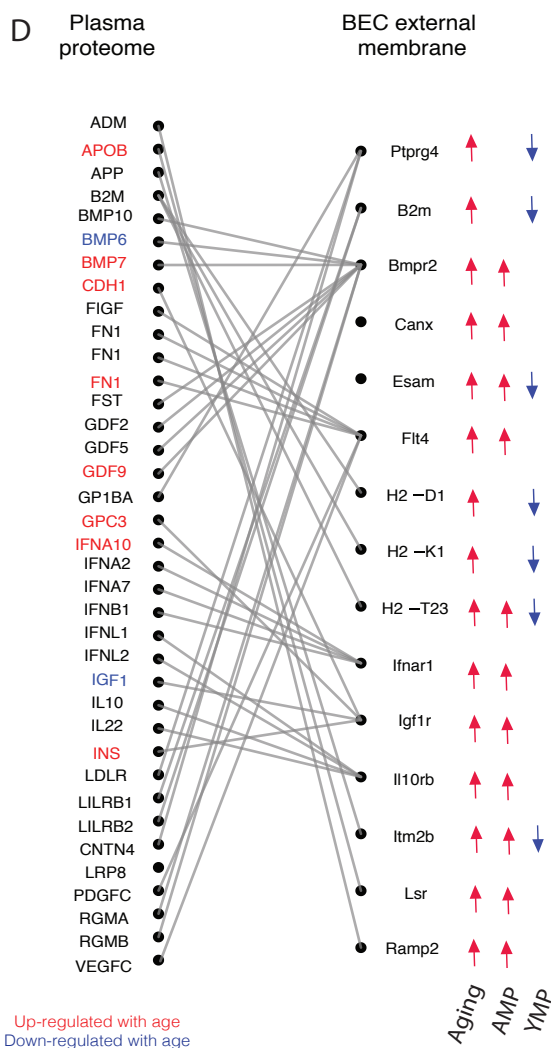

Source: http://biorxiv.org/content/10.1101/617258v1.full.pdf
